# Supplementary material
Source: PubMed Central journal article supplement (PMC3247063)
Supplement: NIHMS337712-supplement-1.pdf [file NIHMS337712-supplement-1.pdf]

**RECURRENT MUTATIONS IN THE *U2AF1* SPLICING FACTOR  
IN MYELODYSPLASTIC SYNDROMES**

Timothy A. Graubert<sup>\*1,3,6</sup>, Dong Shen<sup>\*4</sup>, Li Ding<sup>\*2,4</sup>, Theresa Okeyo-Owuor<sup>1</sup>, Cara L. Lunn<sup>1</sup>, Jin Shao<sup>1</sup>, Kilannin Krysiak<sup>1</sup>, Christopher C. Harris<sup>4</sup>, Daniel C. Koboldt<sup>4</sup>, David E. Larson<sup>4</sup>, Michael D. McLellan<sup>4</sup>, David J. Dooling<sup>4</sup>, Rachel M. Abbott<sup>4</sup>, Robert S. Fulton<sup>4</sup>, Heather Schmidt<sup>4</sup>, Joelle Kalicki-Veizer<sup>4</sup>, Michelle O’Laughlin<sup>4</sup>, Marcus Grillot<sup>1</sup>, Jack Baty<sup>5</sup>, Sharon Heath<sup>1</sup>, John L. Frater<sup>6</sup>, Talat Nasim<sup>7,8</sup>, Daniel C. Link<sup>1,3</sup>, Michael H. Tomasson<sup>1,3</sup>, Peter Westervelt<sup>1,3</sup>, John F. DiPersio<sup>1,3</sup>, Elaine R. Mardis<sup>2,3,4</sup>, Timothy J. Ley<sup>1,2,3,4</sup>, Richard K. Wilson<sup>2,3,4</sup>, and Matthew J. Walter<sup>1,2,3</sup>

<sup>1</sup>Department of Internal Medicine, Division of Oncology, Washington University, St. Louis, MO, USA

<sup>2</sup>Department of Genetics, Washington University, St. Louis, MO, USA

<sup>3</sup>Siteman Cancer Center, Washington University, St. Louis, MO, USA

<sup>4</sup>The Genome Institute, Washington University, St. Louis, MO, USA

<sup>5</sup>Division of Biostatistics, Washington University, St. Louis, MO, USA

<sup>6</sup>Department of Pathology and Immunology, Washington University, St. Louis, MO, USA

<sup>7</sup>Department of Medical and Molecular Genetics, King’s College, Guy’s Hospital, London, UK

<sup>8</sup>National Institute for Health Research (NIHR), Biomedical Research Centre, Guy’s and St. Thomas’ NHS Foundation Trust and King’s College London, UK

\*these authors contributed equally.

## TABLE OF CONTENTS

### A. Supplementary Note

### B. Supplementary Figures

- Supplementary Figure 1. Survival analysis in transplanted vs. non-transplanted patients.*
- Supplementary Figure 2. Genomic architecture of UPN 266395 index MDS patient.*
- Supplementary Figure 3. U2AF1 S34F mutation induces splicing alterations in FMR1.*
- Supplementary Figure 4. U2AF1 quantitative RT-PCR and global expression profiling.*

### C. Supplementary Tables

- Supplementary Table 1. Sequence metrics.*
- Supplementary Table 2. Tier 1-3 validated SNVs.*
- Supplementary Table 3. Tier 1 SNV annotation.*
- Supplementary Table 4. Annotation of U2AF1 mutations.*
- Supplementary Table 5. Clinical characteristics of MDS patients with U2AF1 mutations.*
- Supplementary Table 6. Significantly dysregulated genes in U2AF1 mutant MDS samples vs. controls.*
- Supplementary Table 7. Clinical characteristics of MDS replication cohort.*
- Supplementary Table 8. Primers used for U2AF1 sequencing.*
- Supplementary Table 9. Microarray-based expression of mutated genes.*

### D. Supplementary References

## SUPPLEMENTARY NOTE

**Clinical history of index case (UPN 266395).** The patient was a 65 year old male of European ancestry who presented with anemia and thrombocytopenia (white blood cell count 5,900/mcl, hemoglobin 9.6 g/dl, platelet count 53,000/mcl). A bone marrow biopsy and aspirate showed 60% cellularity with trilineage hematopoiesis, without excess blasts or overt dysplasia. His marrow was felt to be abnormal, but not diagnostic of a myelodysplastic or myeloproliferative disorder. Cytogenetics showed a 46, XY karyotype. He was initially treated with recombinant erythropoietin without improvement, and two months later was referred for evaluation with the following blood counts: white blood cell count 40,300/mcl, hemoglobin 9.4 g/dl, platelet count 33,000/mcl. A bone marrow biopsy and aspirate were repeated (including specimens obtained for tissue banking after obtaining informed consent with specific language authorizing whole genome sequencing which was approved by the Washington University Human Research Protection Office), and showed a 100% cellular marrow, with trilineage dysplasia and 7% blasts, interpreted as MDS/RAEB-1. Cytogenetics again showed a normal male karyotype. His IPSS score was 1.5 (Intermediate-2). At that time, erythropoietin was continued and hydroxyurea was added (1500 mg daily).

One month later, the patient presented with increased fatigue, blurred vision, and dyspnea and was found to have a white blood cell count of 147,000/mcl, hemoglobin 8.9 g/dl, platelet count 36,000/mcl, with 27% circulating blasts. A bone marrow biopsy and aspirate were repeated (including specimens obtained for tissue banking after obtaining informed consent with specific language authorizing whole genome sequencing which was approved by the Washington University Human Research Protection Office). The bone marrow biopsy showed >90% cellularity, with 60% blasts with irregular nuclear contours (NBE positive, largely myeloperoxidase negative). Flow cytometry demonstrated coexpression of CD13 and CD33, with variable expression of CD64 and CD117, most consistent with AML M5b (AML with monocytic differentiation). He received emergency leukopheresis and began 5-azacytidine (160 mg subcutaneously, days 1-7 of 28), for a total of 6 cycles.

Seven months later, the patient developed mental status changes and was found to have leukemic relapse in the central nervous system. He received supportive care until his death 322 days after initial presentation, and 246 days after evolution to sAML.

The patient had a prior history of coronary artery disease, hyperlipidemia, and recurrent pneumonia. There was no significant family history of cancer.

## RESULTS

**Genome coverage.** Individual reads were aligned to the reference genome (NCBI build 36) and only unique reads (deduplicated reads) were used to determine haploid coverage of the genome for the normal and sAML samples (38.23x and 39.12x, respectively, **Supplementary Table 1**). We obtained at least 32x haploid coverage for all autosomal chromosomes in the normal genome and ~half this coverage for chromosomes X and Y, as expected (**Supplementary Fig. 2**). At least 99.42% of the consensus coding DNA sequence (CCDS) was covered by at least 1 read in both genomes (**Supplementary Table 1**). We identified all the heterozygous and homozygous SNPs present in the normal and sAML genomes using the Affymetrix SNP 6.0 arrays and determined diploid coverage for each genome based on the number of these SNPs that were identified using the WGS data, as previously described<sup>1</sup>. Using this approach, we achieved 98.91% and 99.31% diploid coverage of the normal and sAML genomes, respectively (**Supplementary Table 1**).

**Detection and validation of somatic single nucleotide variants and insertions/deletions.** 1281 potential somatic single nucleotide variants (SNVs) and 8801 indels were identified in the

sAML genome after filtering out low quality data and variants present in the matched normal genome and previously identified SNPs. These variant calls were prioritized into non-overlapping tiers for downstream validation, as previously described<sup>1</sup>. 1233 SNV predictions were tested using the custom capture approach, of which 507 validated (**Supplementary Table 2**). This represents an overall validation rate of 507/1233 (41%) and 16/38 (42%) for tier 1 high confidence (HC). 16 indel predictions were validated (none in Tier 1). 505 of the 507 SNVs (99.6 %) were present in the MDS genome, and 2 were new in the sAML genome (sAML-specific) (**Supplementary Table 2**).

**Copy number alterations and loss of heterozygosity.** Using WGS data, we identified 42 putative amplifications. None of these calls were supported by LOH analysis and there were no instances of copy number neutral LOH (**Supplementary Fig. 2**). 4 putative copy number alterations were detected using the Affymetrix SNP 6.0 array data (SNPa). Deep sequencing after solid phase capture of the called sites in the normal, MDS, and sAML samples did not support any of the copy number predictions. Therefore, no confirmed structural variants were detected in this genome.

**Luciferase- $\beta$ -galactosidase double-reporter assay.** Transient co-expression of the pTN24 double-reporter plasmid and the wild-type or S34F mutant *U2AF1* cDNA, with or without the Tra2 $\alpha$  splicing enhancer or hnRNPG splicing inhibitor, was performed in 293T cells in 3 independent experiments, with one representative example shown in **Fig. 3a**. Each experiment had 6 replicate data values for each combination of conditions. A significant increase in splicing (as detected by an increase in the luciferase/ $\beta$ -galactosidase ratio) occurred with expression of the mutant *U2AF1* compared to wild-type *U2AF1* when co-expressed with pTN24 in 3 experiments ( $P \leq 0.004$ ). Co-expression of the Tra2 $\alpha$  splicing enhancer or hnRNPG splicing inhibitor resulted in increased and decreased splicing of the pTN24 reporter plasmid, as expected, that was independent of wild-type or mutant *U2AF1* expression. Experiments were analyzed independently. Transient co-expression of a control plasmid (vector) or the mutant *U2AF1* with or without a siRNA targeting the endogenous *U2AF1* was performed in 3 independent experiments, with one representative example shown in **Fig. 3b**. Each experiment had 6 replicate data values for each combination of conditions. A significant increase in splicing (as detected by an increase in the luciferase/ $\beta$ -galactosidase ratio) occurred in all 3 experiments when comparing the vector and *U2AF1* mutant cDNAs, independent of knockdown of *U2AF1* ( $P \leq 0.04$ ).

**Alternative splicing of *FMR1*.** The *FMR1* gene, fragile X mental retardation 1, contains several alternative cryptic 3' splice acceptor sites in exon 15<sup>2</sup>. We performed RT-PCR using primers that flanked the cryptic splice sites and measured the relative abundance of splice acceptor site usage, as previously described<sup>2</sup>. We used RNA extracted from 7 unfractionated bone marrow samples harvested from MDS patients with a *U2AF1* mutation and 5 samples from MDS patients without a *U2AF1* mutation. Two independent experiments were performed using cDNA obtained from these samples and results are shown in **Supplementary Fig. 3a**. The splicing ratio is defined as the ratio of mRNAs resulting from the use of an alternative 3' cryptic splice acceptor site located within exon 15 (resulting in 124 or 85 base pair amplicons) compared to the normal splice acceptor site (160 base pair amplicon). There was an increased utilization of a cryptic 3' splice acceptor site in MDS samples harboring a *U2AF1* mutation compared to MDS samples without *U2AF1* mutations ( $p < 0.03$  for both independent experiments,  $p = 0.0001$  for pooled data).

Next, we validated this result by creating a *FMR1* minigene splicing reporter construct using the same genomic locus interrogated in the clinical samples. Each experiment was repeated with four biologic replicates. The *FMR1* minigene was transiently transfected into 293T cells with a control plasmid (pcDNA3.1-YFP), wild-type *U2AF1* cDNA, or mutant (S34F)

*U2AF1* cDNA in the presence of a control siRNA or siRNA targeting the endogenous *U2AF1*. RNA was harvested 48 hours later and a reverse transcriptase (RT) reaction was performed to create cDNA. Expression of the S34F mutant *U2AF1* resulted in an increase in cryptic 3' splice acceptor usage compared to control or wild-type *U2AF1*, independent of endogenous *U2AF1* levels ( $P < 0.04$ ) (**Supplementary Fig. 3b**).

**RT-PCR of *U2AF1*.** Quantitative RT-PCR of *U2AF1* revealed no difference in the expression levels between mutant and wild-type MDS samples ( $p = 0.73$ , **Supplementary Fig. 4a, left panel**). A dominant RT-PCR product was identified for both wild-type and mutant *U2AF1*, consistent with isoform “a” expression (**Supplementary Fig. 4a, right panel**). Cloning and sequencing of RT-PCR products obtained from *U2AF1* mutant MDS samples UPN 300813 and UPN 571656 revealed isoform “a” by Sanger sequencing (data not shown) and next-generation sequencing (**Fig. 1c**).

**Gene expression profiling.** We compared the expression level of the 30 genes containing tier 1 mutations in our index sAML sample (UPN 266395) with the expression in 43 *de novo* AML samples for which exon array data was available (T. Ley, unpublished data). 28 genes had at least 3 probesets on the array. For these 28 genes, at least one probeset was called present in 27 genes in the sAML case (**Supplementary Table 9**). All 27 genes were also expressed in >50% of the *de novo* AML cases and the one gene not expressed in the sAML case (*POPDC3*) had only 1/13 probes expressed in ~50% of AML cases (**Supplementary Table 9**). 27 of the 30 mutated genes had probesets in the mutated exon. 14 of these were expressed in sAML (and in *de novo* AML) and 13 were not (vs. 11 absent in >50% of *de novo* AML cases). Overall, the expression pattern of the 28 genes with tier 1 mutations analyzed by microarray was highly similar in the sAML and *de novo* AML samples.

Affymetrix U133plus2 gene expression array data was available for 15 MDS and 4 control samples, as previously described<sup>3</sup>. RNA was extracted from CD34+ purified bone marrow cells for all samples. Array data was generated from the same batch analysis for the 19 samples and 6 of the 15 MDS samples had *U2AF1* mutations. First, we performed unsupervised hierarchical clustering using 19 arrays (4 control, 6 *U2AF1* mutant MDS samples, and 9 *U2AF1* wild-type MDS samples) and observed that clustering of samples was independent of disease or mutation status. When we restricted our clustering analysis to the 4 control and 6 *U2AF1* mutant samples, using 37,552 probesets that remained after removing probesets absent in all samples and using Ward's, UPGMA, or WPGMA clustering algorithms with Euclidean distance, we observed segregation of the mutant samples (**Supplementary Fig. 4b, left panel**). To identify the most significantly differentially expressed genes between control and *U2AF1* mutant MDS samples from the list of 37,552 probesets, we used the Significance Analysis of Microarray (SAM)<sup>4</sup> and Gene Set Enrichment Analysis (GSEA)<sup>5</sup> supervised algorithms. While we found no significant gene sets using GSEA, we did identify 50 probesets that were up-regulated and 351 probesets that were down-regulated in *U2AF1* mutant samples compared to controls with a false discovery rate (FDR) <0.005 (**Supplementary Table 6**). *U2AF1* mutant and control samples segregated by hierarchical clustering when we used 401 SAM defined probesets, as expected (**Supplementary Fig. 4b, right panel**). We analyzed up- and down-regulated genes to identify common pathways based on functional annotation categories (including gene ontology) using DAVID<sup>6</sup>. Nine annotation clusters were identified by DAVID using the 351 down-regulated probesets (300 with unique gene symbols) in *U2AF1* mutant samples that had an enrichment score >2. Three of the 9 clusters contained “mRNA splicing/processing” genes (enrichment score = 2.46) and two clusters with “RRM”(RNA recognition motif) genes (enrichment scores = 3-4.3) involved in splicing (**Supplementary Fig. 4c, Supplementary Table 6**). When genes that segregated control samples from *U2AF1* wild-type MDS samples were analyzed in DAVID, “splicing” and “RRM” categories were not

enriched, suggesting that down-regulation of splicing and RRM genes is not common to all MDS samples, but instead is associated with *U2AF1* mutations. Collectively, these results suggest that a regulatory feedback loop may exist for mRNA splicing genes when *U2AF1* is mutated.

## No Transplant

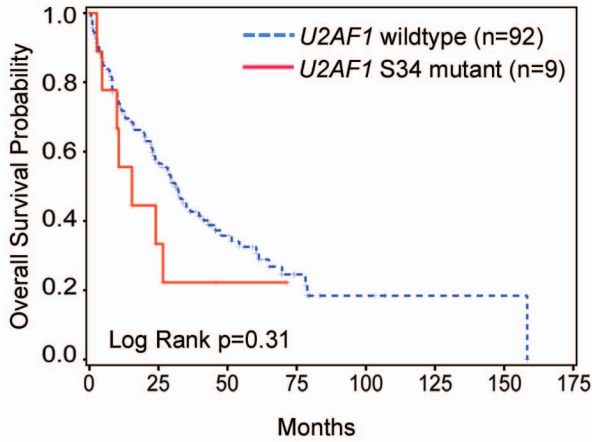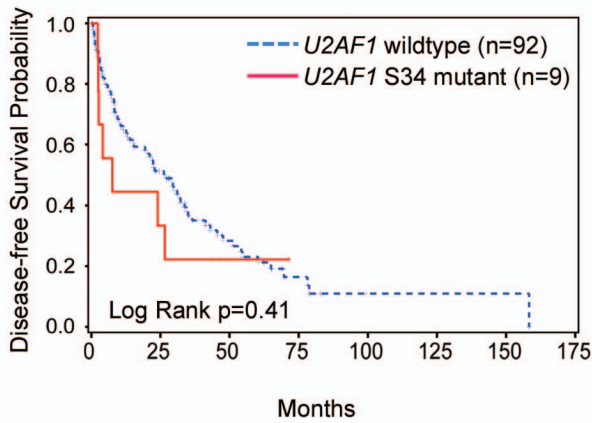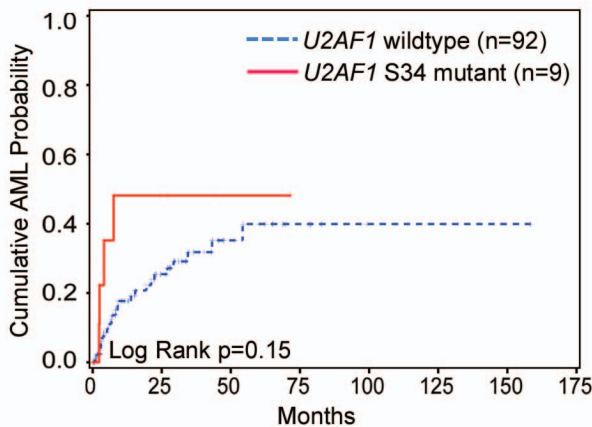

## Transplant

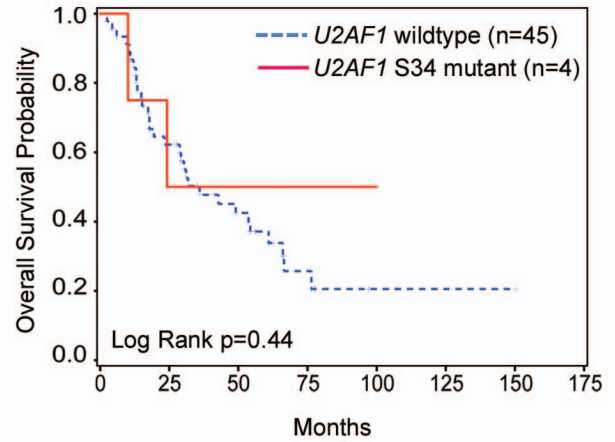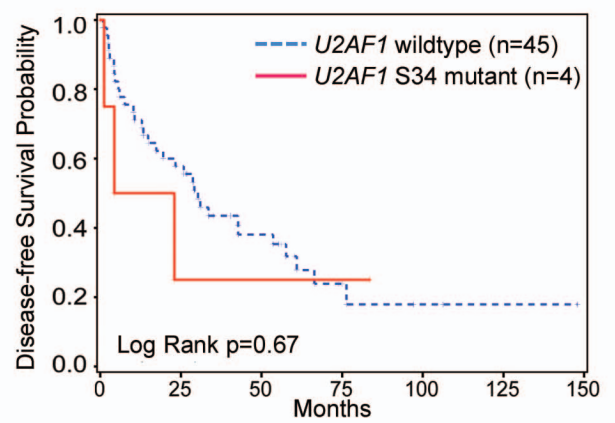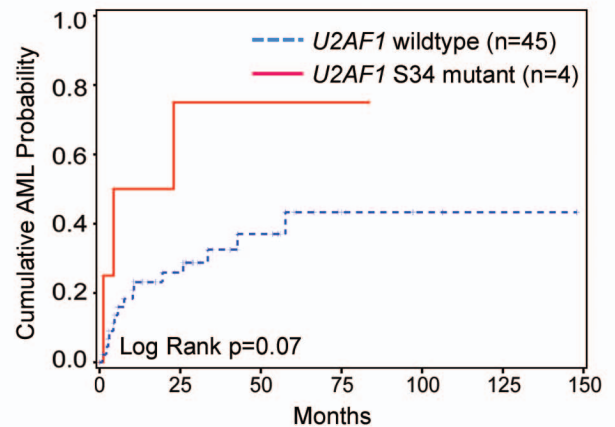

### Supplementary Figure 1. Survival analysis in transplanted vs. non-transplanted patients.

(left column) Overall, event-free survival, and probability of progression to sAML was not significantly different in U2AF1 wildtype vs. mutant MDS patients who did not undergo stem cell transplantation.

(right) Overall, event-free survival, and probability of progression to sAML was not significantly different in U2AF1 wildtype vs. mutant MDS patients who did undergo stem cell transplantation.

a

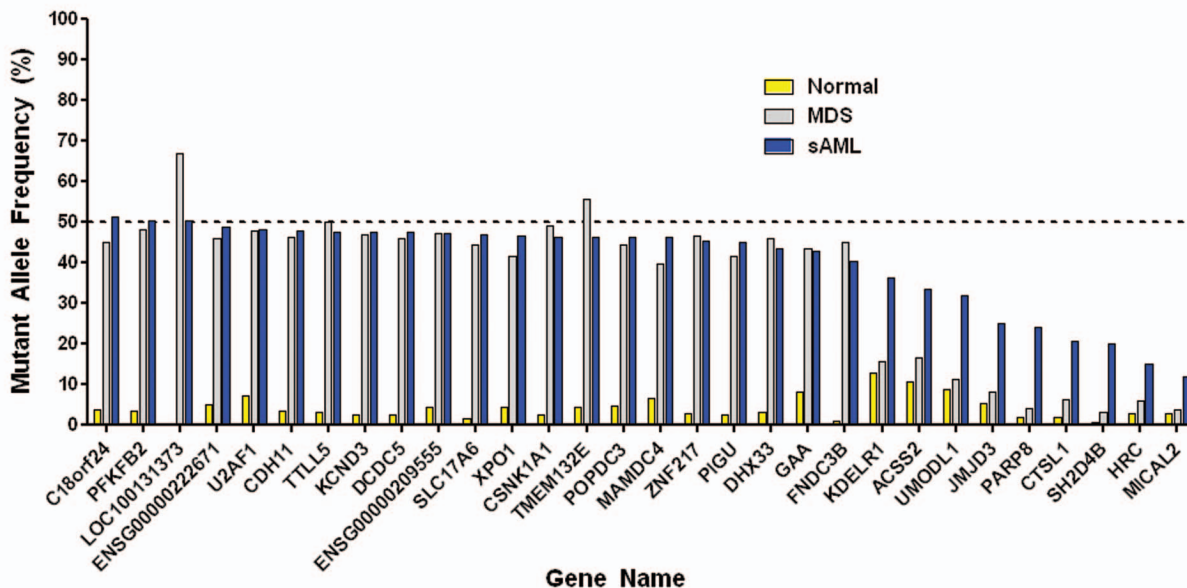

b

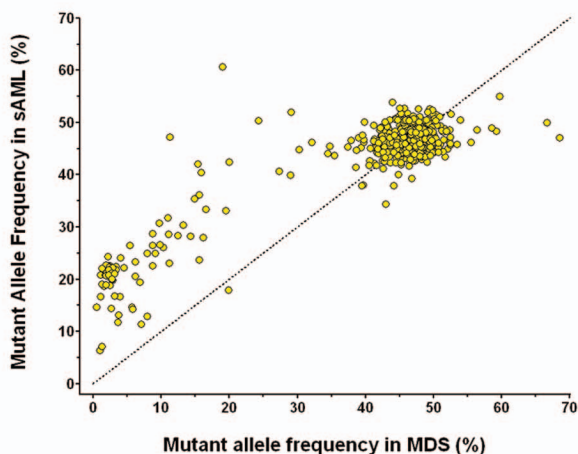

c

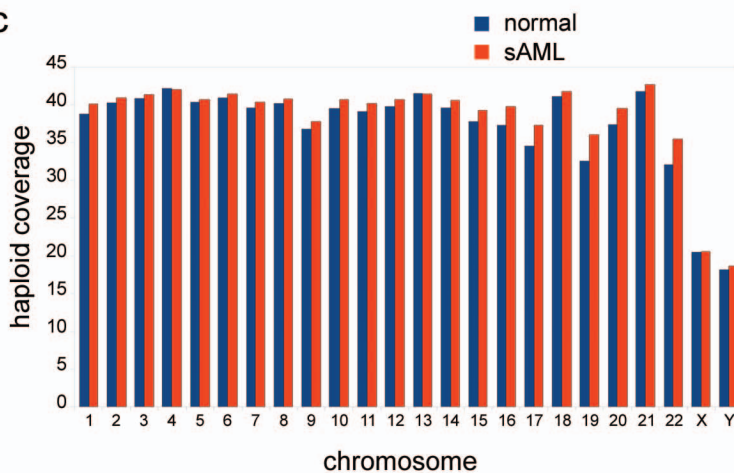

d

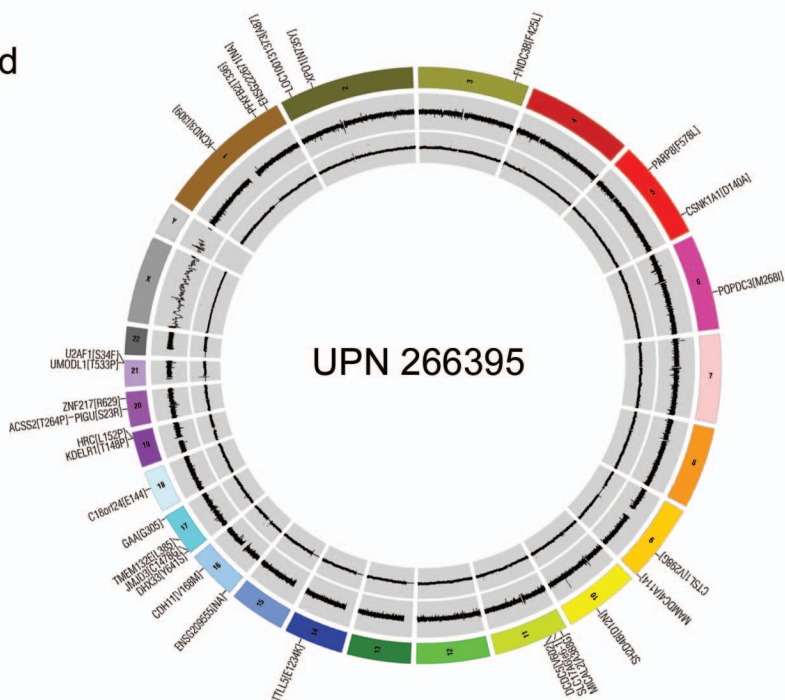

**Supplementary Figure 2. Genomic architecture of UPN266395 index MDS patient.** (a) Mutant allele frequencies of tier 1 SNVs from capture/deep sequencing of normal (skin), MDS, and sAML samples are shown. (b) Mutant allele frequencies of 507 validated somatic tier 1-3 SNVs from capture/deep sequencing are shown for the MDS vs. sAML samples. A single dominant clone was present in MDS and persisted at the sAML stage. Only 2 SNVs were acquired or enriched between MDS and sAML. (c) Sequence coverage from WGS was uniform across chromosomes and between normal (skin) and sAML samples. (d) Circos plot summarizing somatic changes identified by WGS in index case. Outer ring: validated tier 1 SNVs; middle ring: heterozygosity of sAML sample (no loss of heterozygosity detected); inner ring: copy number of sAML sample (no copy number alterations detected). SNV, single nucleotide variant. UPN, unique patient number.



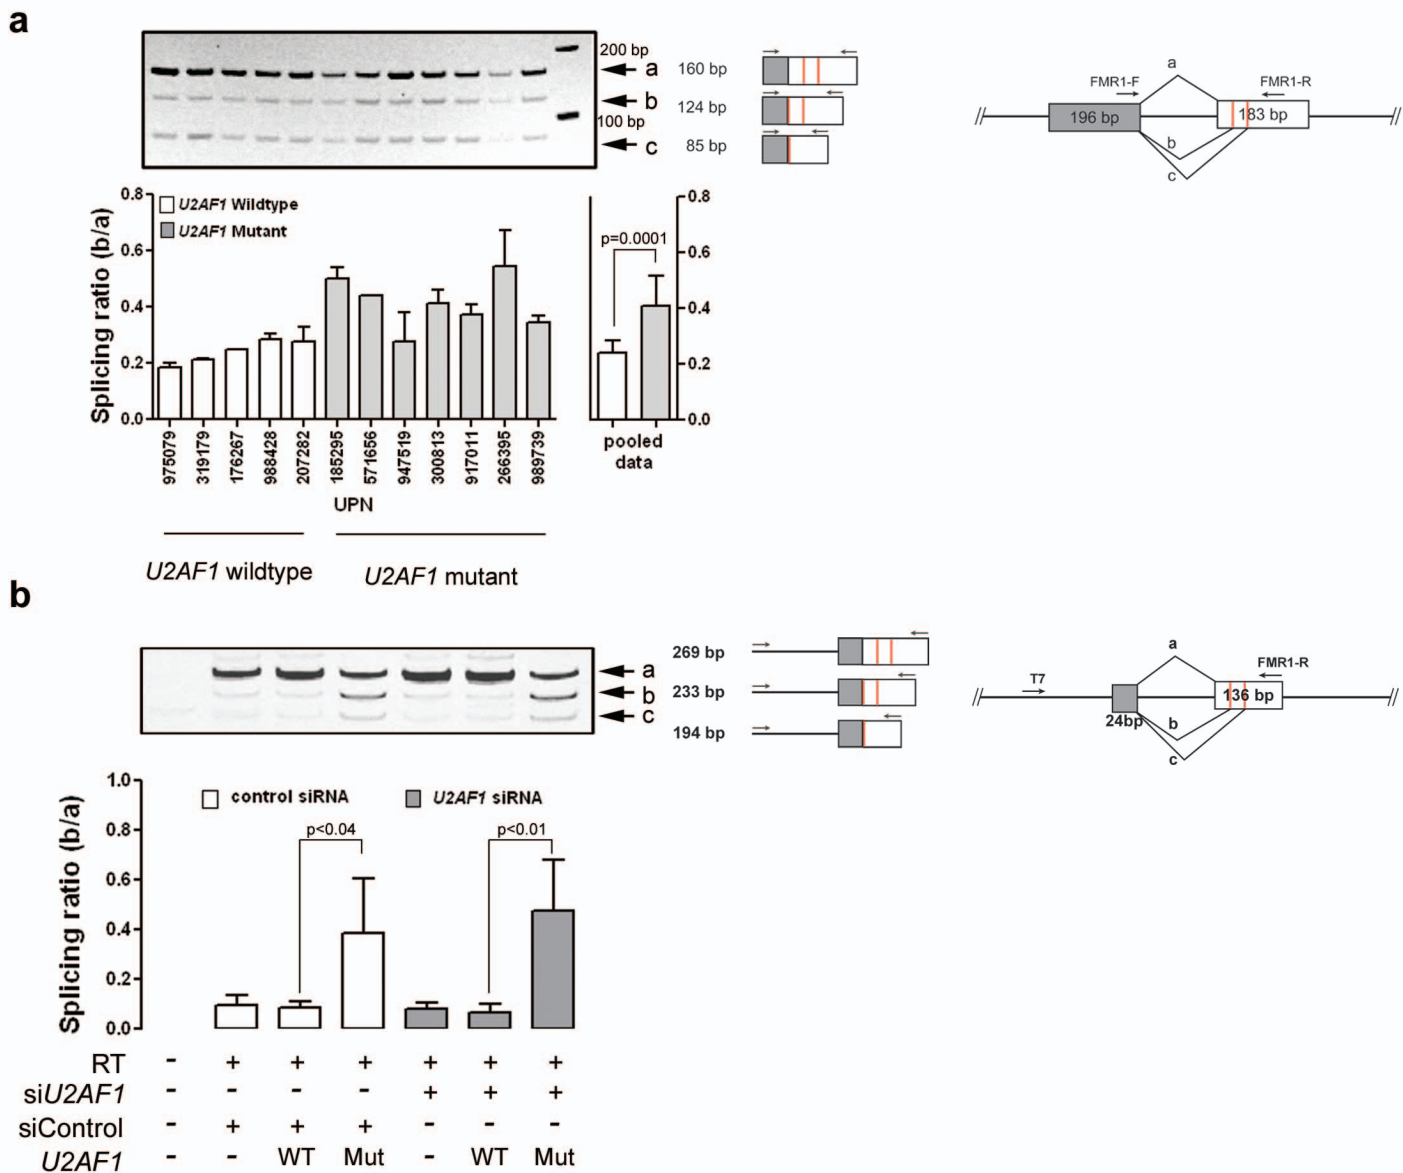

**Supplementary Figure 3. U2AF1 S34F mutation induces splicing alterations in FMR1.** (a) The relative ratios of alternatively spliced products was measured following RT-PCR of RNA extracted from unpurified bone marrow cells from patients with (n=7) and without (n=5) U2AF1 mutations. A cartoon of FMR1 exons 14 and 15 that are interrogated by the assay and the possible splice products are indicated (labeled a, b, or c). A representative PCR gel image is shown and the ratio of the middle band (amplicon b, utilizing the 3' cryptic splice acceptor site) relative to the fully spliced upper band (amplicon a) is shown for each condition. The ratio of splice products was measured by densitometry and plotted in the bar graph with the p-value listed. Patient samples with U2AF1 mutations had increased usage of a cryptic 3' splice acceptor site in exon 15 of FMR1 relative to nonmutant patient samples (left panel, error bars represent two independent experiments) (wildtype vs. mutant splicing ratio,  $p < 0.03$  for both independent experiments in the left panel,  $p = 0.0001$  for pooled data in the right panel). (b) The FMR1 minigene (generated using primers shown in panel a) was transiently transfected into 293T cells with a control plasmid (pcDNA3.1-YFP), wild-type U2AF1 cDNA, or mutant (S34F) U2AF1 cDNA in the presence of a control siRNA or siRNA targeting endogenous U2AF1. RNA was harvested 48 hours later and a reverse transcriptase reaction was performed to create cDNA. PCR using the indicated primers resulted in a fully spliced 269 base pair amplicon or smaller amplicons (233 or 194 basepairs) that skip the first splice acceptor site. A representative PCR gel image is shown and the ratio of the middle band (cryptic 3' splice acceptor site = amplicon b) relative to the fully spliced upper band (amplicon a) is shown for each condition. Expression of S34F mutant U2AF1 resulted in an increase in cryptic 3' splice acceptor usage compared to control or wild-type U2AF1, independent of endogenous U2AF1 levels (n=4,  $P < 0.04$ ).

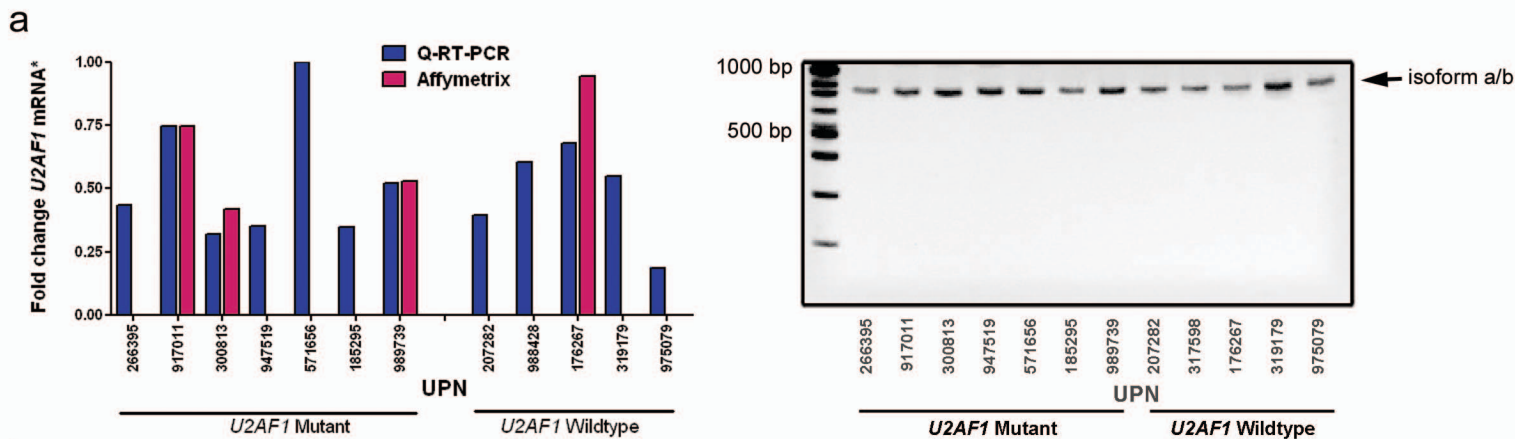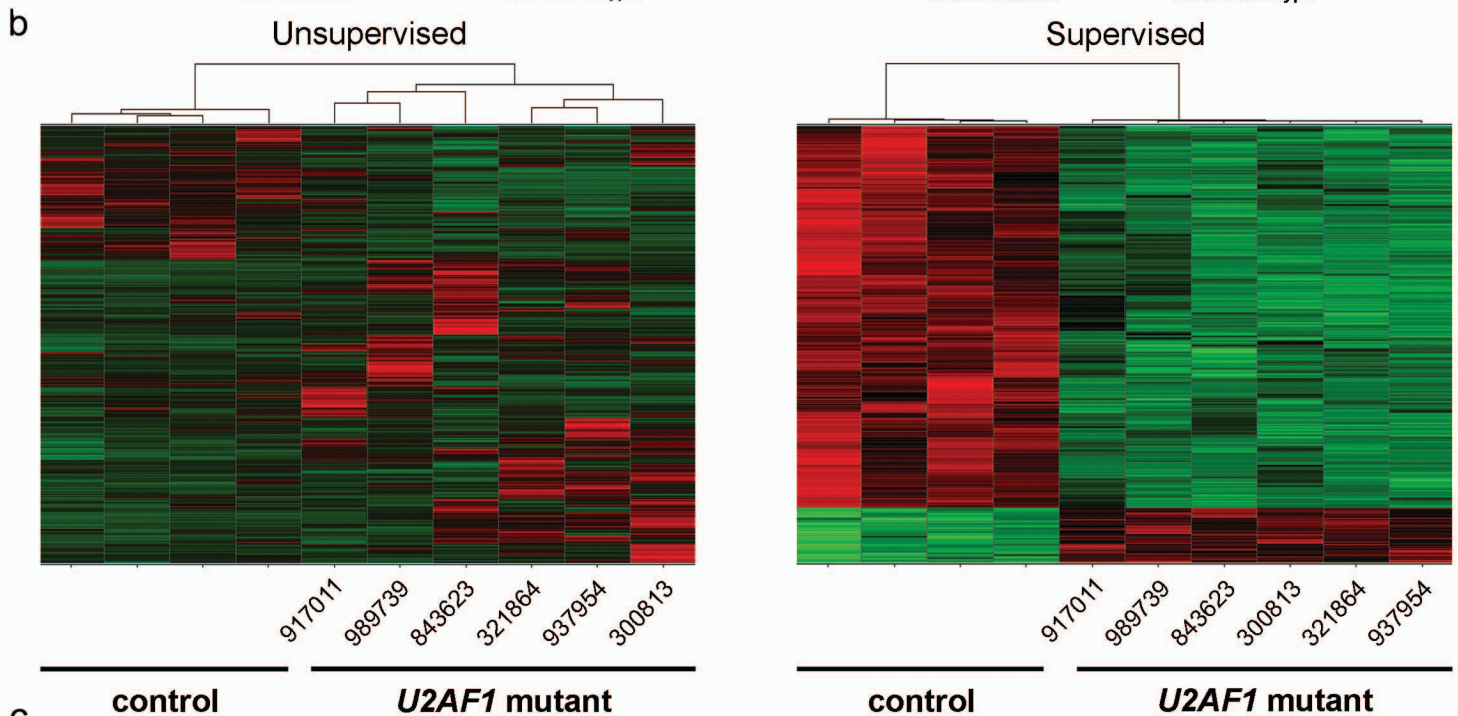

**c**

| Annotation Cluster 1 |                                                | Enrichment Score: 7.715 |               |                 |                   |
|----------------------|------------------------------------------------|-------------------------|---------------|-----------------|-------------------|
| Category             | Term                                           | # genes                 | % total genes | Fold Enrichment | Benjamini p-value |
| GOTERM_CC_FAT        | GO:0031974:membrane-enclosed lumen             | 67                      | 22.33         | 2.09            | 8.89E-07          |
| GOTERM_CC_FAT        | GO:0070013:intracellular organelle lumen       | 64                      | 21.33         | 2.08            | 1.41E-06          |
| GOTERM_CC_FAT        | GO:0043233:organelle lumen                     | 64                      | 21.33         | 2.03            | 2.29E-06          |
| GOTERM_CC_FAT        | GO:0031981:nuclear lumen                       | 52                      | 17.33         | 2.07            | 3.73E-05          |
| Annotation Cluster 2 |                                                | Enrichment Score: 4.311 |               |                 |                   |
| Category             | Term                                           | # genes                 | % total genes | Fold Enrichment | Benjamini p-value |
| SMART                | SM00360:RRM                                    | 14                      | 4.67          | 4.18            | 3.33E-03          |
| INTERPRO             | IPR000504:RNA recognition motif, RNP-1         | 14                      | 4.67          | 3.92            | 3.70E-02          |
| INTERPRO             | IPR012677:Nucleotide-binding, alpha-beta plait | 14                      | 4.67          | 3.88            | 2.05E-02          |

**Supplementary Figure 4. U2AF1 quantitative RT-PCR and global expression profiling.** (a, left panel) qRT-PCR of *U2AF1* (exons 2-3 of isoform A) mRNA was performed using RNA extracted from unpurified bone marrow cells from patients with (n=7) and without (n=5) *U2AF1* mutations. Affymetrix U133plus2 array data were available for 4 of the patients and are plotted for comparison. There was no significant difference in the expression of *U2AF1* in mutant vs. wild-type MDS patient samples (p=0.73). (a, right panel) RT-PCR was performed using RNA extracted from unpurified bone marrow cells from patients with (n=7) and without (n=5) *U2AF1* mutations. Primers were designed to detect all 3 isoforms of *U2AF1*. Full-length isoform a was detected in all samples, independent of mutation status. (b, left panel) Unsupervised hierarchical clustering results using Ward's method and 37,552 probesets from Affymetrix U133plus2 arrays (probesets were excluded only if absent in all samples being compared). RNA was obtained from CD34+ purified bone marrow cells from 4 normal healthy controls and 6 MDS samples with a *U2AF1* mutation. (b, right panel) Supervised hierarchical clustering using Ward's method and 401 probesets identified by Significance Analysis of Microarrays (SAM), comparing control and *U2AF1* mutant MDS samples with a false discovery rate (FDR) < 0.005. (c) Nine gene ontology annotation clusters were identified by DAVID using 351 probesets (300 gene symbols) that were down-regulated in *U2AF1* mutant compared to control samples (identified by SAM) and had an enrichment score > 2 in DAVID. The top 2 clusters are shown. RNA recognition motif (RRM) gene categories were down-regulated in the *U2AF1* samples compared to control samples. UPN, unique patient number. \* relative to GAPDH mRNA expression.

**Supplementary Table 1. Sequence metrics.**

| Parameter                                | Normal Genome | MDS Tumor Genome | sAML Tumor Genome |
|------------------------------------------|---------------|------------------|-------------------|
| <b>Whole Genome Sequence</b>             |               |                  |                   |
| lanes                                    | 8             | ND               | 12                |
| sequence production (Gbp)                | 134.91        | ND               | 132.24            |
| aligned (Gbp)                            | 122.80        | ND               | 124.37            |
| deduplicated (Gbp)                       | 114.50        | ND               | 116.32            |
| haploid coverage                         | 38.23         | ND               | 39.12             |
| bases with $\geq 1x$ coverage (%)        | 92.97         | ND               | 93.00             |
| bases with $>10x$ coverage (%)           | 91.87         | ND               | 92.49             |
| bases with $>20x$ coverage (%)           | 86.23         | ND               | 89.12             |
| CCDS bases with $\geq 1x$ coverage (%)   | 99.42         | ND               | 99.67             |
| CCDS bases with $\geq 10x$ coverage (%)  | 92.24         | ND               | 97.21             |
| CCDS bases with $\geq 20x$ coverage (%)  | 73.61         | ND               | 88.52             |
| Het SNPs (Affy)                          | 226,603       | ND               | 224,808           |
| Hom SNPs (Affy)                          | 166,483       | ND               | 167,609           |
| Diploid coverage Het SNPs (%)            | 98.91         | ND               | 99.31             |
| Diploid coverage Hom SNPs (%)            | 99.55         | ND               | 99.17             |
| <b>Capture Validation</b>                |               |                  |                   |
| target bases with $\geq 1x$ coverage (%) | 93.06         | 93.78            | 94.86             |
| target bases with $>10x$ coverage (%)    | 87.16         | 88.53            | 91.34             |
| target bases with $>20x$ coverage (%)    | 84.22         | 86.15            | 89.84             |

CCDS, consensus coding DNA sequence; ND, not done.

Het SNPs, single nucleotide polymorphic sites genotyped as heterozygous using Affymetric 6.0 SNP array and both wildtype and variant alleles detected in whole genome sequence data

Hom SNPs, single nucleotide polymorphic sites genotyped as homozygous using Affymetric 6.0 SNP array and only variant allele detected in whole genome sequence data















|    |             |   |   |                 |   |                         |  |      |     |       |      |     |       |       |           |         |       |     |       |       |         |         |       |   |
|----|-------------|---|---|-----------------|---|-------------------------|--|------|-----|-------|------|-----|-------|-------|-----------|---------|-------|-----|-------|-------|---------|---------|-------|---|
| 21 | 26,646,726  | G | A |                 | 0 | 3                       |  | 0    | 215 | 0     | 0.00 | 385 | 9     | 2.28  | 2.28      | Somatic | 0.018 | 522 | 137   | 20.79 | 20.79   | Somatic | 0.000 | 2 |
| 21 | 30,459,290  | C | T | CLDN8           | 3 | 3_prime_flanking_region |  | 370  | 16  | 4.15  | 921  | 766 | 45.41 | 45.41 | Somatic   | 0.000   | 354   | 330 | 48.25 | 48.25 | Somatic | 0.000   | 1     |   |
| 21 | 41,416,902  | G | A | BACE2           | 3 | 5_prime_flanking_region |  | 1038 | 32  | 2.99  | 664  | 560 | 45.75 | 45.75 | Somatic   | 0.000   | 399   | 339 | 45.93 | 45.93 | Somatic | 0.000   | 1     |   |
| 21 | 42,402,818  | A | C | UMODL1          | 1 | missense                |  | 84   | 8   | 8.70  | 65   | 8   | 10.96 | 10.96 | Somatic   | 0.577   | 161   | 75  | 31.78 | 31.78 | Somatic | 0.000   | 0     |   |
| 21 | 43,397,525  | G | A | U2AF1           | 1 | missense                |  | 404  | 30  | 6.91  | 91   | 83  | 47.70 | 47.70 | Somatic   | 0.000   | 343   | 317 | 48.03 | 48.03 | Somatic | 0.000   | 1     |   |
| 21 | 46,252,211  | C | T | COL6A1          | 2 | 3_prime_flanking_region |  | 92   | 1   | 1.08  | 89   | 67  | 42.95 | 42.95 | Somatic   | 0.000   | 213   | 170 | 44.39 | 44.39 | Somatic | 0.000   | 1     |   |
| 21 | 46,301,845  | G | T | COL6A2          | 2 | 5_prime_flanking_region |  | 46   | 0   | 0.00  | 11   | 2   | 15.38 | 15.38 | Reference | 0.041   | 251   | 182 | 42.03 | 42.03 | Somatic | 0.000   | 0     |   |
| 22 | 18,187,764  | C | T | GNB1L           | 3 | intronic                |  | 387  | 7   | 1.78  | 104  | 92  | 46.94 | 46.94 | Somatic   | 0.000   | 223   | 211 | 48.62 | 48.62 | Somatic | 0.000   | 1     |   |
| 22 | 19,294,334  | C | G | ENSG00000220150 | 3 | 5_prime_flanking_region |  | 265  | 25  | 8.62  | 128  | 119 | 48.18 | 48.18 | Somatic   | 0.000   | 360   | 298 | 45.29 | 45.29 | Somatic | 0.000   | 1     |   |
| 22 | 20,866,781  | G | A | IGLV11-55       | 3 | 5_prime_flanking_region |  | 328  | 21  | 6.02  | 185  | 239 | 56.37 | 56.37 | Somatic   | 0.000   | 165   | 156 | 48.60 | 48.60 | Somatic | 0.000   | 0     |   |
| 22 | 36,194,879  | A | C | ELFN2           | 3 | 5_prime_flanking_region |  | 735  | 74  | 9.15  | 291  | 56  | 16.14 | 16.14 | Somatic   | 0.000   | 502   | 195 | 27.98 | 27.98 | Somatic | 0.000   | 0     |   |
| 22 | 38,089,713  | C | T | SYNGR1          | 3 | intronic                |  | 954  | 46  | 4.60  | 97   | 89  | 47.85 | 47.85 | Somatic   | 0.000   | 145   | 139 | 48.94 | 48.94 | Somatic | 0.000   | 1     |   |
| 22 | 46,395,195  | C | T | FLJ46257        | 3 | 3_prime_flanking_region |  | 378  | 10  | 2.58  | 137  | 111 | 44.76 | 44.76 | Somatic   | 0.000   | 302   | 308 | 50.49 | 50.49 | Somatic | 0.000   | 1     |   |
| 22 | 46,512,620  | A | G |                 | 0 | 3                       |  | 471  | 11  | 2.28  | 526  | 17  | 3.13  | 3.13  | Somatic   | 0.421   | 431   | 115 | 21.06 | 21.06 | Somatic | 0.000   | 2     |   |
| X  | 3,387,861   | G | A |                 | 0 | 3                       |  | 375  | 0   | 0.00  | 362  | 21  | 5.48  | 2.74  | Somatic   | 0.000   | 167   | 112 | 40.14 | 20.07 | Somatic | 0.000   | 2     |   |
| X  | 29,779,410  | G | A | IL1RAPL1        | 2 | intronic                |  | 121  | 6   | 4.72  | 21   | 384 | 94.81 | 47.41 | Somatic   | 0.000   | 19    | 292 | 93.89 | 46.95 | Somatic | 0.000   | 1     |   |
| X  | 32,777,396  | C | T | DMD             | 3 | intronic                |  | 414  | 38  | 8.41  | 31   | 496 | 94.12 | 47.06 | Somatic   | 0.000   | 21    | 292 | 93.29 | 46.65 | Somatic | 0.000   | 1     |   |
| X  | 34,705,765  | A | G |                 | 0 | 3                       |  | 217  | 29  | 11.79 | 7    | 287 | 97.62 | 48.81 | Somatic   | 0.000   | 12    | 311 | 96.28 | 48.14 | Somatic | 0.000   | 1     |   |
| X  | 39,157,340  | A | G |                 | 0 | 3                       |  | 283  | 22  | 7.21  | 22   | 391 | 94.67 | 47.34 | Somatic   | 0.000   | 22    | 413 | 94.94 | 47.47 | Somatic | 0.000   | 1     |   |
| X  | 52,897,186  | C | T | FAM156B         | 3 | 5_prime_flanking_region |  | 226  | 11  | 4.64  | 18   | 368 | 95.34 | 47.67 | Somatic   | 0.000   | 14    | 282 | 95.27 | 47.64 | Somatic | 0.000   | 1     |   |
| X  | 104,353,541 | G | C | IL1RAPL2        | 3 | intronic                |  | 141  | 21  | 12.96 | 24   | 327 | 93.16 | 46.58 | Somatic   | 0.000   | 19    | 424 | 95.71 | 47.86 | Somatic | 0.000   | 1     |   |
| X  | 111,088,560 | G | A | TRPC5           | 3 | intronic                |  | 253  | 11  | 4.17  | 39   | 584 | 93.74 | 46.87 | Somatic   | 0.000   | 15    | 321 | 95.54 | 47.77 | Somatic | 0.000   | 1     |   |
| X  | 116,699,743 | C | A |                 | 0 | 3                       |  | 219  | 25  | 10.25 | 34   | 461 | 93.13 | 46.57 | Somatic   | 0.000   | 11    | 396 | 97.30 | 48.65 | Somatic | 0.000   | 1     |   |
| X  | 118,033,017 | G | A | LONRF3          | 3 | intronic                |  | 473  | 37  | 7.25  | 18   | 437 | 96.04 | 48.02 | Somatic   | 0.000   | 16    | 351 | 95.64 | 47.82 | Somatic | 0.000   | 1     |   |
| X  | 132,324,635 | C | T | GPC4            | 3 | intronic                |  | 642  | 64  | 9.07  | 61   | 841 | 93.24 | 46.62 | Somatic   | 0.000   | 21    | 412 | 95.15 | 47.58 | Somatic | 0.000   | 1     |   |
| X  | 142,016,065 | C | T | ENSG00000202473 | 3 | 3_prime_flanking_region |  | 59   | 6   | 9.23  | 10   | 139 | 93.29 | 46.64 | Somatic   | 0.000   | 8     | 164 | 95.35 | 47.67 | Somatic | 0.000   | 1     |   |
| X  | 151,265,229 | C | T | GABRA3          | 3 | intronic                |  | 621  | 28  | 4.31  | 50   | 711 | 93.43 | 46.71 | Somatic   | 0.000   | 14    | 376 | 96.41 | 48.21 | Somatic | 0.000   | 1     |   |
| Y  | 9,231,939   | G | A | TTTY20          | 2 | intronic                |  | 115  | 8   | 6.50  | 6    | 96  | 94.12 | 47.06 | Somatic   | 0.000   | 17    | 226 | 93.00 | 46.50 | Somatic | 0.000   | 1     |   |
| Y  | 15,681,536  | T | C |                 | 0 | 3                       |  | 359  | 9   | 2.45  | 512  | 41  | 7.41  | 3.71  | Somatic   | 0.015   | 308   | 110 | 26.32 | 13.16 | Somatic | 0.000   | 0     |   |
| Y  | 22,378,497  | C | T | ENSG00000217635 | 3 | 5_prime_flanking_region |  | 217  | 24  | 9.96  | 9    | 209 | 95.87 | 47.94 | Somatic   | 0.000   | 17    | 196 | 92.02 | 46.01 | Somatic | 0.000   | 1     |   |
| Y  | 22,830,969  | C | T | RBMV1J          | 3 | 5_prime_flanking_region |  | 158  | 11  | 6.51  | 12   | 215 | 94.71 | 47.36 | Somatic   | 0.000   | 13    | 321 | 96.11 | 48.05 | Somatic | 0.000   | 1     |   |

**Supplementary Table 3. Annotated Tier 1 Mutations in the MDS and sAML genomes.**

| Chromosome | Position*   | Reference allele | Variation allele | Gene symbol     | Transcript ID   | Strand | Mutation type  | Mutated in MDS | Mutated in sAML | Zygoty | Coding position | Amino acid change |
|------------|-------------|------------------|------------------|-----------------|-----------------|--------|----------------|----------------|-----------------|--------|-----------------|-------------------|
| 1          | 112,325,945 | G                | T                | KCND3           | NM_004980       | -1     | synonymous     | Y              | Y               | Het    | c.927           | I309              |
| 1          | 205,309,412 | C                | G                | PFKFB2          | NM_006212       | 1      | synonymous     | Y              | Y               | Het    | c.1008          | T336              |
| 1          | 229,096,537 | T                | C                | ENSG00000222671 | ENST00000410739 | 1      | non-coding RNA | Y              | Y               | Het    | NA              | NA                |
| 2          | 20,289,990  | C                | T                | LOC100131373    | XM_001720891    | 1      | synonymous     | Y              | Y               | Het    | c.261           | A87               |
| 2          | 61,569,230  | T                | A                | XPO1            | NM_003400       | -1     | missense       | Y              | Y               | Het    | c.2203          | N735Y             |
| 3          | 173,529,456 | C                | A                | FNDC3B          | NM_022763       | 1      | missense       | Y              | Y               | Het    | c.1275          | F425L             |
| 5          | 50,152,869  | C                | G                | PARP8           | NM_024615       | 1      | missense       | Y              | Y               | Het    | c.1734          | F578L             |
| 5          | 148,880,083 | T                | G                | CSNK1A1         | NM_001025105    | -1     | missense       | Y              | Y               | Het    | c.419           | D140A             |
| 6          | 105,713,110 | C                | A                | POPDC3          | NM_022361       | -1     | missense       | Y              | Y               | Het    | c.804           | M268I             |
| 9          | 89,535,224  | T                | G                | CTSL1           | NM_001912       | 1      | missense       | Y              | Y               | Het    | c.893           | V298G             |
| 9          | 138,867,831 | C                | T                | MAMDC4          | NM_206920       | 1      | synonymous     | Y              | Y               | Het    | c.342           | A114              |
| 10         | 82,288,101  | G                | A                | SH2D4B          | NM_207372       | 1      | missense       | Y              | Y               | Het    | c.34            | D12N              |
| 11         | 12,198,538  | C                | G                | MICAL2          | NM_014632       | 1      | missense       | Y              | Y               | Het    | c.1163          | A388G             |
| 11         | 22,340,860  | G                | T                | SLC17A6         | NM_020346       | 1      | splice_site    | Y              | Y               | Het    | c.662-1         | e6-1              |
| 11         | 30,881,639  | A                | G                | DCDC5           | ENST00000406071 | -1     | synonymous     | Y              | Y               | Het    | c.1806          | V602              |
| 14         | 75,418,958  | G                | A                | TLL5            | NM_015072       | 1      | missense       | Y              | Y               | Het    | c.3700          | E1234K            |
| 16         | 7,716,860   | C                | T                | ENSG00000209555 | ENST00000386820 | -1     | non-coding RNA | Y              | Y               | Het    | NA              | NA                |
| 16         | 63,589,987  | C                | T                | CDH11           | NM_001797       | -1     | missense       | Y              | Y               | Het    | c.502           | V168M             |
| 17         | 5,288,451   | T                | G                | DHX33           | NM_020162       | -1     | missense       | Y              | Y               | Het    | c.1922          | Y641S             |
| 17         | 7,696,343   | T                | G                | JMJD3           | NM_001080424    | 1      | missense       | Y              | Y               | Het    | c.4432          | C1478G            |
| 17         | 29,981,226  | C                | T                | TMEM132E        | NM_207313       | 1      | synonymous     | Y              | Y               | Het    | c.1155          | L385              |
| 17         | 75,696,250  | G                | A                | GAA             | NM_000152       | 1      | synonymous     | Y              | Y               | Het    | c.915           | G305              |
| 18         | 46,165,704  | G                | A                | C18orf24        | NM_001039535    | 1      | synonymous     | Y              | Y               | Het    | c.432           | E144              |
| 19         | 53,579,461  | T                | G                | KDELR1          | NM_006801       | -1     | missense       | Y              | Y               | Het    | c.442           | T148P             |
| 19         | 54,349,852  | A                | G                | HRC             | NM_002152       | -1     | missense       | Y              | Y               | Het    | c.455           | L152P             |
| 20         | 32,728,482  | A                | C                | PIGU            | NM_080476       | -1     | missense       | Y              | Y               | Het    | c.69            | S23R              |
| 20         | 32,965,857  | A                | C                | ACSS2           | NM_018677       | 1      | missense       | Y              | Y               | Het    | c.790           | T264P             |
| 20         | 51,626,823  | T                | C                | ZNF217          | NM_006526       | -1     | synonymous     | Y              | Y               | Het    | c.1887          | R629              |
| 21         | 42,402,818  | A                | C                | UMODL1          | NM_173568       | 1      | missense       | Y              | Y               | Het    | c.1597          | T533P             |
| 21         | 43,397,525  | G                | A                | U2AF1           | NM_001025203    | -1     | missense       | Y              | Y               | Het    | c.101           | S34F              |

\*build 36

Supplementary Table 4. U2AF1 Somatic Mutations in MDS.

| UPN     | gene name | chromosome | start    | stop     | reference allele | variant allele | transcript   | strand | mutation type | coding position | amino acid change | SIFT     | SIFT score | PolyPhen2         | PolyPhen2 score |
|---------|-----------|------------|----------|----------|------------------|----------------|--------------|--------|---------------|-----------------|-------------------|----------|------------|-------------------|-----------------|
| 02-86   | U2AF1     | 21         | 43397525 | 43397525 | G                | A              | NM_001025203 | -1     | missense      | c.101           | p.S34F            | damaging | 0          | probably damaging | 1               |
| 185295  | U2AF1     | 21         | 43397525 | 43397525 | G                | A              | NM_001025203 | -1     | missense      | c.101           | p.S34F            | damaging | 0          | probably damaging | 1               |
| 266395  | U2AF1     | 21         | 43397525 | 43397525 | G                | A              | NM_001025203 | -1     | missense      | c.101           | p.S34F            | damaging | 0          | probably damaging | 1               |
| 300813  | U2AF1     | 21         | 43397525 | 43397525 | G                | A              | NM_001025203 | -1     | missense      | c.101           | p.S34F            | damaging | 0          | probably damaging | 1               |
| 321864  | U2AF1     | 21         | 43397525 | 43397525 | G                | A              | NM_001025203 | -1     | missense      | c.101           | p.S34F            | damaging | 0          | probably damaging | 1               |
| 463763  | U2AF1     | 21         | 43397525 | 43397525 | G                | A              | NM_001025203 | -1     | missense      | c.101           | p.S34F            | damaging | 0          | probably damaging | 1               |
| 571656  | U2AF1     | 21         | 43397525 | 43397525 | G                | A              | NM_001025203 | -1     | missense      | c.101           | p.S34F            | damaging | 0          | probably damaging | 1               |
| 843623  | U2AF1     | 21         | 43397525 | 43397525 | G                | A              | NM_001025203 | -1     | missense      | c.101           | p.S34F            | damaging | 0          | probably damaging | 1               |
| 917011  | U2AF1     | 21         | 43397525 | 43397525 | G                | A              | NM_001025203 | -1     | missense      | c.101           | p.S34F            | damaging | 0          | probably damaging | 1               |
| 947519* | U2AF1     | 21         | 43397525 | 43397525 | G                | A              | NM_001025203 | -1     | missense      | c.101           | p.S34F            | damaging | 0          | probably damaging | 1               |
| 989739  | U2AF1     | 21         | 43397525 | 43397525 | G                | A              | NM_001025203 | -1     | missense      | c.101           | p.S34F            | damaging | 0          | probably damaging | 1               |
| 137250  | U2AF1     | 21         | 43397525 | 43397525 | G                | T              | NM_001025203 | -1     | missense      | c.101           | p.S34Y            | damaging | 0          | probably damaging | 1               |
| 937954  | U2AF1     | 21         | 43397525 | 43397525 | G                | T              | NM_001025203 | -1     | missense      | c.101           | p.S34Y            | damaging | 0          | probably damaging | 1               |
| 947519* | U2AF1     | 21         | 43387846 | 43387846 | T                | C              | NM_001025203 | -1     | missense      | c.470           | p.Q157R           | damaging | 0          | probably damaging | 0.999           |

UPN, unique patient number

\* same UPN

**Supplementary Table 5. Characteristics of MDS patients with *U2AF1* Mutations**

| UPN                 | Gender | Age at diagnosis | FAB    | Karyotype                                                                        | %BM Blast | IPSS | Therapy after MDS banking (months)                                       | AML Progression? | OS (months) | EFS (months) |
|---------------------|--------|------------------|--------|----------------------------------------------------------------------------------|-----------|------|--------------------------------------------------------------------------|------------------|-------------|--------------|
| 266395 <sup>a</sup> | M      | 65               | RAEB   | 46,XY[20]                                                                        | 7         | 1    | azacytidine (6)                                                          | yes              | 11          | 2            |
| 137250              | F      | 54               | RAEB   | 46,XX[20]                                                                        | 19        | 2    | standard induction, allogeneic SCT                                       | yes              | 100         | 1            |
| 185295              | M      | 50               | RA     | 46,XY,del(20)(q11.2q13.3)[7]/46,XY,[13]                                          | 0         | 0.5  | PTK/ZK (<1), azacytidine (2), allogeneic SCT                             | no               | 97          | 83           |
| 300813              | F      | 42               | RA     | 46,XX[20]                                                                        | 2         | 0    | none                                                                     | no               | 71          | 71           |
| 321864              | F      | 63               | RAEB   | 46,XX+8[20]                                                                      | 12        | 2.5  | standard induction                                                       | no               | 3           | 3            |
| 571656              | M      | 71               | RAEB   | 46,XY,del(20)(q11.2q13.3)[12]/46XY[8]                                            | 4         | 0.5  | standard induction                                                       | yes              | 10          | 8            |
| 843623              | M      | 60               | RAEB   | 46,XY,del(20)(q11.3)[2]/46,XY[18]                                                | 6         | 1    | none                                                                     | yes              | 5           | 2            |
| 917011              | M      | 79               | RA     | 46,XY,del(20)(q11.2)[12]/ 46,XY[8]                                               | 0         | 0.5  | lenalidomide (3)                                                         | no               | 27          | 25           |
| 937954              | M      | 51               | RAEB   | 47,XY,+8[1]/47, idem, del(16)(q12.1)[13]/48, idem,+Y, del(16)(q11.1)[5]/46,XY[1] | 12        | 2.5  | azacytidine (3)                                                          | no               | 24          | 24           |
| 947519              | M      | 59               | RAEB   | 46,XY,1-5dms[10]/46,XY[12]                                                       | 7         | 1.5  | decitabine (3), allogeneic SCT, standard induction, salvage chemotherapy | yes              | 24          | 23           |
| 02-86               | M      | 53               | RAEB-T | 92<4n>,XXYY,del(4)(q33)x2,del(5)(q13),add(11) (q23)x2[cp8]/46,XY[12]             | 21        | 3    | decitabine (2)                                                           | yes              | 10          | 4            |
| 463763              | M      | 54               | RA     | 47,XY,+Y[6]/46,XY[14]                                                            | 0         | 0.5  | none                                                                     | no               | 46          | 44           |
| 989739              | M      | 71               | RAEB   | 46,XY,del(7)(q21)[11]/47,XY,+8[5]/46,XY[4]                                       | 18        | 3    | decitabine (8)                                                           | yes              | 15          | 4            |

UPN, unique patient number; OS, overall survival; EFS, event-free survival; PTK/ZK (Vatalanib), VEGF inhibitor.

<sup>a</sup>index case









Supplementary Table 7. Clinical Characteristics of MDS replication cohort.

| UPN    | Gender | Age @<br>Diagnosis | %BM<br>Blast | FAB    | Cytogenetics                                                                                                                                                                                             | [-5, del(5q)]<br>(0=no/1=yes) | [-20, del(20q)]<br>(0=no/1=yes) | [-7, del(7q)]<br>(0=no/1=yes) | [+8]<br>(0=no/1=yes) | IPSS | Disease Status<br>(0=alive/1=dead) | Days from Dx to<br>Death or Last<br>Follow-up | Evolution to<br>AML<br>(0=no/1=yes) | Days from Dx<br>to AML or last<br>Follow-up | DNMT3A<br>status<br>(0=wt/1=mut) | U2AF1 status<br>(0=wt/1=mut) |
|--------|--------|--------------------|--------------|--------|----------------------------------------------------------------------------------------------------------------------------------------------------------------------------------------------------------|-------------------------------|---------------------------------|-------------------------------|----------------------|------|------------------------------------|-----------------------------------------------|-------------------------------------|---------------------------------------------|----------------------------------|------------------------------|
| 100901 | M      | 70                 | 4            | RA     | 46,XY,del(3)(q21)[16]/46,XY[4]                                                                                                                                                                           | 0                             | 0                               | 0                             | 0                    | 0.5  | 1                                  | 1857                                          | 0                                   | 1654                                        | 0                                | 0                            |
| 105327 | F      | 54                 | 1            | RA     | 46,XX[20]                                                                                                                                                                                                | 0                             | 0                               | 0                             | 0                    | 0.0  | 1                                  | 1647                                          | 0                                   | 1646                                        | 0                                | 0                            |
| 112848 | M      | 62                 | 5            | RAEB   | 46,XY,del(5)(q13q33)[18]/46,XY[1]/45,XY,-5[1]                                                                                                                                                            | 1                             | 0                               | 0                             | 0                    | 0.5  | 1                                  | 2116                                          | 0                                   | 2033                                        | 0                                | 0                            |
| 116960 | F      | 55                 | 2            | RA     | 46,XX,t(11;13)(q23;q14)[14]/47,idem,+2[2]/46,XX[3]/46,XX,inv(14)(q11,q32)[1]                                                                                                                             | 0                             | 0                               | 0                             | 0                    | 1.0  | 0                                  | 2362                                          | 0                                   | 2246                                        | 0                                | 0                            |
| 123363 | M      | 64                 | 0            | RA     | 46,XY[19]/46,XY,del(20)(q11,q13.1)[1]                                                                                                                                                                    | 0                             | 0                               | 0                             | 0                    | 0.0  | 0                                  | 2421                                          | 0                                   | 2402                                        | 0                                | 0                            |
| 124124 | F      | 66                 | 18           | RAEB   | 46,XX[20]                                                                                                                                                                                                | 0                             | 0                               | 0                             | 0                    | 2.0  | 1                                  | 998                                           | 1                                   | 891                                         | 0                                | 0                            |
| 127804 | M      | 63                 | 2            | RA     | 46,XY[20]                                                                                                                                                                                                | 0                             | 0                               | 0                             | 0                    | 0.5  | 1                                  | 2375                                          | 0                                   | 2368                                        | 0                                | 0                            |
| 131153 | M      | 78                 | 8            | RAEB   | 44,XY,dup(3)(p21p25),-5,-6,del(12)(q15q22),psu dic(15;14)(p13;q32),add(17)(p11.2),add(19)(q13.3),7i(22;22)(q12.13),+mar[20]                                                                              | 1                             | 0                               | 0                             | 0                    | 2.0  | 1                                  | 621                                           | 0                                   | 619                                         | 0                                | 0                            |
| 137250 | F      | 54                 | 19           | RAEB   | 46,XX[20]                                                                                                                                                                                                | 0                             | 0                               | 0                             | 0                    | 2.0  | 0                                  | 3037                                          | 1                                   | 38                                          | 0                                | 1                            |
| 137313 | F      | 77                 | 0            | RA     | 47,XX,+8[6]/46,XX[14]                                                                                                                                                                                    | 0                             | 0                               | 0                             | 0                    | 1.0  | 1                                  | 320                                           | 0                                   | 144                                         | 0                                | 0                            |
| 137404 | F      | 70                 | 0            | RAR    | 46,XX,add(1)(p11.3),del(1)(q23),add(3)(p13),del(5)(q13q33),add(8)(p11.2),add(9)(q22),add(10)(q22),add(11)(p14),-12,del(17)(q21),+mar[17]/46,XX[3]                                                        | 1                             | 0                               | 0                             | 0                    | 1.0  | 1                                  | 674                                           | 0                                   | 663                                         | 0                                | 0                            |
| 173005 | M      | 77                 | 10           | RAEB   | 45,XY,der(3)(5)(p10;p10),-18,-20,+2mar[12]/46,idem,+21[5]/46,XY[3]                                                                                                                                       | 0                             | 0                               | 0                             | 0                    | 2.0  | 1                                  | 800                                           | 0                                   | 71                                          | 0                                | 0                            |
| 176267 | M      | 56                 | 7            | RAEB   | 43-47,XY,del(5)(q13q33),der(7)(7;11)(q11.2;q21),-9,-12,der(16)(12;16)(q10;q22),add(16)(q23),+mar1,+mar2[cp12]/44-46,XY,del(5)(q13q33),der(7)(7;11)(q11.2;q21),t(12;16)(q10;q22)[cp8]                     | 1                             | 0                               | 0                             | 0                    | 2.0  | 1                                  | 137                                           | 1                                   | 93                                          | 1                                | 0                            |
| 177356 | F      | 76                 | 2            | RA     | 46,XX[20]                                                                                                                                                                                                | 0                             | 0                               | 0                             | 0                    | 0.0  | 0                                  | 1304                                          | 0                                   | 747                                         | 0                                | 0                            |
| 182896 | M      | 75                 | 0            | RA     | 46,XY,add(4)(p16),t(4;20)(q25;p13),del(5)(q13q33)[13]/46,idem,del(6)(q25)[1]/47,XY,+8[6]                                                                                                                 | 0                             | 0                               | 0                             | 1                    | 1.0  | 1                                  | 1205                                          | 1                                   | 1047                                        | 0                                | 0                            |
| 184368 | F      | 49                 | 0            | RA     | 46,XX[20]                                                                                                                                                                                                | 0                             | 0                               | 0                             | 0                    | 0.0  | 0                                  | 2013                                          | 0                                   | 81                                          | 0                                | 0                            |
| 184874 | F      | 56                 | 2            | RAR    | 47,XX,+8[10]/46,XX[10]                                                                                                                                                                                   | 0                             | 0                               | 0                             | 1                    | 0.5  | 1                                  | 2020                                          | 0                                   | 2020                                        | 0                                | 0                            |
| 185295 | M      | 50                 | 0            | RA     | 46,XY,del(20)(q11,q13.3)[7]/46,XY[13]                                                                                                                                                                    | 0                             | 1                               | 0                             | 0                    | 0.5  | 0                                  | 2539                                          | 0                                   | 2538                                        | 0                                | 1                            |
| 189012 | M      | 64                 | 3            | RA     | 46,XY,del(5)(q15q33)[16]/46,XY,del(5)(q12q33),del(7)(q21q32)[1]/46,XY[3]                                                                                                                                 | 1                             | 0                               | 0                             | 0                    | 0.5  | 0                                  | 1250                                          | 0                                   | 1230                                        | 0                                | 0                            |
| 189474 | M      | 61                 | 4            | RAEB   | 46,XY[3]                                                                                                                                                                                                 | 0                             | 0                               | 0                             | 0                    | 0.5  | 0                                  | 1336                                          | 0                                   | 907                                         | 0                                | 0                            |
| 194328 | M      | 52                 | 1            | RA     | 46,XY[20]                                                                                                                                                                                                | 0                             | 0                               | 0                             | 0                    | 0.0  | 0                                  | 1702                                          | 0                                   | 809                                         | 0                                | 0                            |
| 197795 | M      | 50                 | 17           | RAEB   | 46,XY[20]                                                                                                                                                                                                | 0                             | 0                               | 0                             | 0                    | 1.5  | 1                                  | 1064                                          | 0                                   | 457                                         | 0                                | 0                            |
| 199019 | F      | 60                 | 0            | RA     | 45-49,XX,+1,add(3)(p11),del(5)(q13q33),del(10)(q24q26),add(18)(q21),+19,-20,+21,+1-2mar[cp20]                                                                                                            | 1                             | 1                               | 0                             | 0                    | 1.5  | 1                                  | 1491                                          | 1                                   | 1020                                        | 0                                | 0                            |
| 201641 | M      | 62                 | 14           | RAEB   | 44-45,XY,del(3)(q12),add(5)(q35),del(5)(q12q33),del(7)(q22),-12,der(17)(7;17)(q22p13)[15]/46,XY[5]                                                                                                       | 1                             | 0                               | 0                             | 0                    | 3.0  | 1                                  | 220                                           | 0                                   | 199                                         | 0                                | 0                            |
| 207282 | M      | 76                 | 11           | RAEB   | 46,XY[20]                                                                                                                                                                                                | 0                             | 0                               | 0                             | 0                    | 2.0  | 1                                  | 251                                           | 1                                   | 122                                         | 1                                | 0                            |
| 222841 | F      | 46                 | 17           | RAEB   | 60<3ns>,XX,-X,add(1)(q44),ins(1)(p36)add(1)(q12),-5,del(5)(q11,q23q3),+6,-7,add(7)(p22),-10,-11,del(12)(q13),add(12)(p13),-13,-14,hsr(14)(p11.1),-16,-16,-18,der(19;21)(q10;q10),+21,-22,+mar5/46,XX[15] | 1                             | 0                               | 1                             | 0                    | 2.5  | 1                                  | 528                                           | 0                                   | 528                                         | 0                                | 0                            |
| 266395 | M      | 65                 | 7            | RAEB   | 46,XY[20]                                                                                                                                                                                                | 0                             | 0                               | 0                             | 0                    | 1.0  | 1                                  | 321                                           | 1                                   | 75                                          | 0                                | 1                            |
| 289033 | F      | 31                 | 13           | RAEB   | 46,XX[20]                                                                                                                                                                                                | 0                             | 0                               | 0                             | 0                    | 2.0  | 1                                  | 367                                           | 1                                   | 28                                          | 0                                | 0                            |
| 298273 | M      | 27                 | 18           | RAEB-T | 46,XY[20]                                                                                                                                                                                                | 0                             | 0                               | 0                             | 0                    | 2.0  | 1                                  | 540                                           | 1                                   | 131                                         | 0                                | 0                            |
| 300813 | F      | 42                 | 2            | RA     | 46,XX[20]                                                                                                                                                                                                | 0                             | 0                               | 0                             | 0                    | 0.0  | 0                                  | 2172                                          | 0                                   | 2172                                        | 0                                | 1                            |
| 312519 | F      | 71                 | 0            | RA     | 46,XX[20]                                                                                                                                                                                                | 0                             | 0                               | 0                             | 0                    | 0.5  | 1                                  | 1026                                          | 0                                   | 436                                         | 0                                | 0                            |
| 313175 | M      | 74                 | 5            | RAEB   | 46,XY[20]                                                                                                                                                                                                | 0                             | 0                               | 0                             | 0                    | 0.0  | 0                                  | 961                                           | 0                                   | 702                                         | 0                                | 0                            |
| 315529 | M      | 56                 | 12           | RAEB   | 46,XY,add(7)(q32),r(8)(p21q24.3),add(11)(p15),t(12;13)(q24.2;q13),-17,r(19)(p13.3q13.4),-20,add(20)(q13.1),-21,+3mar[18]/46,idem,del(5)(q22q34)[1]/46,XY[1]                                              | 0                             | 1                               | 0                             | 0                    | 3.0  | 1                                  | 147                                           | 0                                   | 147                                         | 0                                | 0                            |
| 317598 | M      | 86                 | 11           | RAEB   | 46,XY[20]                                                                                                                                                                                                | 0                             | 0                               | 0                             | 0                    | 2.0  | 1                                  | 30                                            | 0                                   | 30                                          | 1                                | 0                            |
| 319179 | F      | 74                 | 6            | RAEB   | 46,XX[20]                                                                                                                                                                                                | 0                             | 0                               | 0                             | 0                    | 0.5  | 1                                  | 483                                           | 1                                   | 482                                         | 1                                | 0                            |
| 321864 | F      | 63                 | 12           | RAEB   | 47,XX,+8[20]                                                                                                                                                                                             | 0                             | 0                               | 0                             | 0                    | 2.5  | 1                                  | 80                                            | 0                                   | 80                                          | 0                                | 1                            |
| 329877 | M      | 65                 | 0            | RA     | 46,XY[20]                                                                                                                                                                                                | 0                             | 0                               | 0                             | 0                    | 1.5  | 1                                  | 249                                           | 0                                   | 186                                         | 0                                | 0                            |
| 335224 | M      | 65                 | 3            | RA     | 45,XY,del(5)(q22q33),hsr(11)(p15),der(17;22)(q10;q10)[17]/45,XY,idem,hsr(11)(p15)(q23)[3]                                                                                                                | 1                             | 0                               | 0                             | 0                    | 1.5  | 1                                  | 202                                           | 1                                   | 104                                         | 0                                | 0                            |
| 335875 | F      | 46                 | 2            | RA     | 46,XX[20]                                                                                                                                                                                                | 0                             | 0                               | 0                             | 0                    | 0.0  | 0                                  | 1387                                          | 0                                   | 1229                                        | 0                                | 0                            |
| 337081 | M      | 67                 | 10           | RAEB   | 46,XY[20]                                                                                                                                                                                                | 0                             | 0                               | 0                             | 0                    | 0.5  | 1                                  | 1108                                          | 0                                   | 31                                          | 0                                | 0                            |
| 342760 | F      | 77                 | 12           | RAEB   | 46,XX[20]                                                                                                                                                                                                | 0                             | 0                               | 0                             | 0                    | 1.5  | 1                                  | 1447                                          | 0                                   | 1447                                        | 0                                | 0                            |
| 343306 | F      | 62                 | 15           | RAEB   | 40-45,XX,-4,-5,add(10)(p15),add(15)(p11.2),-17,+add(19)(p13.3),add(21)(p11.2),-22,+mar[cp3]/46,XX[10]-only 13 analyzed                                                                                   | 1                             | 0                               | 0                             | 0                    | 3.0  | 1                                  | 686                                           | 0                                   | 683                                         | 0                                | 0                            |
| 346313 | M      | 62                 | 6            | RAEB   | 46,XY[20]                                                                                                                                                                                                | 0                             | 0                               | 0                             | 0                    | 1.0  | 1                                  | 965                                           | 1                                   | 787                                         | 0                                | 0                            |
| 350460 | M      | 30                 | 4            | RA     | 46,XY[17]                                                                                                                                                                                                | 0                             | 0                               | 0                             | 0                    | 0.5  | 1                                  | 905                                           | 0                                   | 904                                         | 0                                | 0                            |
| 362699 | F      | 73                 | 2            | RA     | 46,XX[18]/47,XX,+4[1]/47,XX,+9[1]                                                                                                                                                                        | 0                             | 0                               | 0                             | 0                    | 0.5  | 1                                  | 307                                           | 0                                   | 127                                         | 0                                | 0                            |
| 369682 | M      | 59                 | ND           | RA     | 45,XY,der(5)t(3;5)(q21;q13)[9]/46,idem,+8[6]/46,idem,+mar[1]/46,XY[4]                                                                                                                                    | 0                             | 0                               | 0                             | 1                    | UK   | 1                                  | 34                                            | 1                                   | 91                                          | 0                                | 0                            |
| 372440 | M      | 59                 | 2            | RA     | 46,XY[20]                                                                                                                                                                                                | 0                             | 0                               | 0                             | 0                    | 0.0  | 0                                  | 1891                                          | 0                                   | 1894                                        | 0                                | 0                            |
| 379929 | F      | 39                 | 3            | RA     | 46,XX[20]                                                                                                                                                                                                | 0                             | 0                               | 0                             | 0                    | 0.5  | 1                                  | 290                                           | 1                                   | 224                                         | 1                                | 0                            |
| 391828 | M      | 50                 | 3            | RA     | 46,XY,inv(3)(q21q26.2)[6]/46,XY[14]                                                                                                                                                                      | 0                             | 0                               | 0                             | 0                    | 1.0  | 1                                  | 1852                                          | 0                                   | 1852                                        | 0                                | 0                            |
| 392543 | M      | 74                 | 13           | RAEB   | 55-57,XY,+1,+2,+6,der(7)(7;11)(p22;q13),+9,-10,+11,+13,+14,add(14)(p11.2),add(17)(p11.2),-18,+21,add(21)(p11.2),+22,+1-2r,+1-3mar[cp7]/46,XY[13]                                                         | 0                             | 0                               | 0                             | 0                    | 2.5  | 1                                  | 599                                           | 1                                   | 589                                         | 0                                | 0                            |
| 395621 | F      | 35                 | 6            | RAEB   | 46,XX,der(15)t(1;15)(q10;q10)[15]/46,XX[5]                                                                                                                                                               | 0                             | 0                               | 0                             | 0                    | 1.0  | 1                                  | 541                                           | 1                                   | 140                                         | 0                                | 0                            |
| 411330 | M      | 83                 | 2            | RA     | 45,X,-Y[3]/46,XY[17]                                                                                                                                                                                     | 0                             | 0                               | 0                             | 0                    | 0.0  | 1                                  | 18                                            | 0                                   | 18                                          | 0                                | 0                            |
| 421452 | F      | 33                 | 10           | RAEB   | 46,XX[20]                                                                                                                                                                                                | 0                             | 0                               | 0                             | 0                    | 1.0  | 0                                  | 2016                                          | 1                                   | 90                                          | 0                                | 0                            |
| 429531 | F      | 38                 | 0            | RA     | 46,XX,del(5)(q12q33)[18]/46,XX[2]                                                                                                                                                                        | 1                             | 0                               | 0                             | 0                    | 0.5  | 0                                  | 2951                                          | 0                                   | 2577                                        | 0                                | 0                            |
| 430998 | M      | 56                 | 0            | RA     | 47,XY,+14[5],46,XY,t(4;6)(q10;5)/46,XY[10]                                                                                                                                                               | 0                             | 0                               | 0                             | 0                    | 0.5  | 0                                  | 1067                                          | 0                                   | 706                                         | 0                                | 0                            |
| 431137 | M      | 55                 | 7            | RAEB   | 46,XY,add(2)(q26),del(3)(p13),del(6)(q15q31),-6,+8,add(12)(p11.2),add(15)(p11.1),-18,+22[cp4]/44,sl,-8,-20,-22,+mar[cp5]/44,sl,-del(3),-7,+2mar[cp5]/43,sl,add(X)(q28),+add(12p),+12,-mar[cp6]           | 1                             | 1                               | 1                             | 1                    | 2.0  | 1                                  | 181                                           | 0                                   | 181                                         | 0                                | 0                            |
| 431586 | M      | 68                 | 6            | RAEB   | 87,XY,+X,+1,+1,+2,+2,+3,+3,+4,+4,+5,+5,+6,+6,+7,+7,+8,+8,+9,+9,+10,+10,+11,+11,+12,+12,+13,+13,+14,+14,+15,+15,+16,+16,+17,+17,+18,+18,+19,+19,+20,+20,+21,+21,+22,+22[3]/46,XY[22]                      | 0                             | 0                               | 0                             | 1                    | 1.5  | 1                                  | 337                                           | 1                                   | 275                                         | 0                                | 0                            |
| 447189 | M      | 76                 | 0            | RA     | 46,XY[20]                                                                                                                                                                                                | 0                             | 0                               | 0                             | 0                    | 0.5  | 0                                  | 1795                                          | 0                                   | 1436                                        | 0                                | 0                            |
| 455113 | F      | 68                 | 2            | RA     | 46,XY[20]                                                                                                                                                                                                | 0                             | 0                               | 0                             | 0                    | 0.0  | 0                                  | 2244                                          | 0                                   | 1982                                        | 0                                | 0                            |
| 455194 | M      | 62                 | 2            | RA     | 47,XY,+8[19]/46,XY[1]                                                                                                                                                                                    | 0                             | 0                               | 0                             | 1                    | 0.5  | 0                                  | 1529                                          | 0                                   | 1302                                        | 0                                | 0                            |
| 457721 | M      | 63                 | 22           | RAEB-T | 46,XY[20]                                                                                                                                                                                                | 0                             | 0                               | 0                             | 0                    | 2.5  | 1                                  | 398                                           | 1                                   | 173                                         | 1                                | 0                            |
| 461282 | M      | 65                 | 6            | RAEB   | 46,XY,-17,del(20)(q11.2),f(5)/46,idem,del(5)(q31q33)[10]/46,idem,del(5)(q13q33)[3]/46,idem,-X,add(X)(q22),der(12)t(12;7)(p11.2;7)del(12)(q22)[2]                                                         | 1                             | 1                               | 0                             | 0                    | 2.0  | 1                                  | 2009                                          | 1                                   | 1751                                        | 0                                | 0                            |
| 461321 | F      | 78                 | 6            | RAEB   | 46,XX[18]                                                                                                                                                                                                | 0                             | 0                               | 0                             | 0                    | 0.5  | 0                                  | 981                                           | 1                                   | 178                                         | 0                                | 0                            |
| 462596 | M      | 78                 | 0            | RA     | 46,XY[20]                                                                                                                                                                                                | 0                             | 0                               | 0                             | 0                    | 0.5  | 1                                  | 395                                           | 0                                   | 177                                         | 0                                | 0                            |
| 463763 | M      | 54                 | 0            | RA     | 47,XY,+Y[6]/46,XY[14]                                                                                                                                                                                    | 0                             | 0                               | 0                             | 0                    | 0.5  | 0                                  | 1385                                          | 0                                   | 1332                                        | 0                                | 1                            |
| 485523 | M      | 62                 | 11           | RAEB   | 46,XY[20]                                                                                                                                                                                                | 0                             | 0                               | 0                             | 0                    | 2.0  | 0                                  | 814                                           | 0                                   | 804                                         | 0                                | 0                            |
| 497942 | M      | 38                 | 0            | RA     | 46,XY,der(1;22)(q10;q10)[4]/46,XY[16]                                                                                                                                                                    | 0                             | 0                               | 0                             | 0                    | 1.0  | 1                                  | 4626                                          | 0                                   | 4553                                        | 0                                | 0                            |
| 511734 | M      | 69                 | 4            | RAEB-T | 46,XY[20]                                                                                                                                                                                                | 0                             | 0                               | 0                             | 0                    | 0.0  | 1                                  | 353                                           | 0                                   | 353                                         | 0                                | 0                            |
| 518747 | F      | 47                 | 6            | RAEB   | 46,XX[11]                                                                                                                                                                                                | 0                             | 0                               | 0                             | 0                    | 1.0  | 0                                  | 844                                           | 0                                   | 816                                         | 0                                | 0                            |
| 530722 | M      | 69                 | 13           | RAEB   | 46,XY[20]                                                                                                                                                                                                | 0                             | 0                               | 0                             | 0                    | 2.0  | 1                                  | 311                                           | 1                                   | 24                                          | 0                                | 0                            |
| 530724 | F      | 67                 | 11           | RAEB   | Failed                                                                                                                                                                                                   | 0                             | 0                               | 0                             | 0                    | UK   | 1                                  | 32                                            | 0                                   | 12                                          | 0                                | 0                            |
| 537426 | F      | 57                 | 2            | RA     | 45,XX,-7[20]                                                                                                                                                                                             | 0                             | 0                               | 1                             | 0                    | 1.5  | 0                                  | 1908                                          | 0                                   | 1833                                        | 0                                | 0                            |
| 538267 | F      | 49                 | 12           | RAEB   | 42-88,XX,-X,(3;17)(q21;q21),del(5)(q15q33),-10,t(2;18)(q11.2;q11.2),-12,-13,t(17;20)(q21;11.2)add(17)(p11.2),dic(19;21)(p13q22),+r,+mar[cp18]/46,XX[2]                                                   | 1                             | 0                               | 0                             | 0                    | 3.0  | 1                                  | 407                                           | 0                                   | 407                                         | 0                                | 0                            |
| 543465 | M      | 75                 | 11           | RAEB   | 46,XY[20]                                                                                                                                                                                                | 0                             | 0                               | 0                             | 0                    | 2.0  | 0                                  | 3080                                          | 1                                   | 160                                         | 0                                | 0                            |
| 547403 | M      | 61                 | 16           | RAEB   | 46,X,-Y,+14[2]/45,X,-Y[2]/45,XY,-20[1]                                                                                                                                                                   | 0                             | 0                               | 0                             | 0                    | 2.5  | 1                                  | 132                                           | 0                                   | 132                                         | 0                                | 0                            |
| 545462 | M      | 80                 | 0            | RA     | 46,XY,del(20)(q11.2q13.3)[8]/46,XY,+8[3]/46,XY[9]                                                                                                                                                        | 0                             | 1                               | 0                             | 0                    | 0.5  | 1                                  | 1256                                          | 1                                   | 1314                                        | 0                                | 0                            |
| 557468 | M      | 76                 | 18           | RAEB   | 46,XY[20]                                                                                                                                                                                                | 0                             | 0                               | 0                             | 0                    | 2.0  | 1                                  | 712                                           | 1                                   | 217                                         | 0                                | 0                            |
| 558896 | M      | 73                 | 15           | RAEB   | 47-50,XY,t(2;19)(p16;p13),del(5)(q12q33),-11,-18,-20,+r,+2-6mar[4]/41-50,sl,+5,del(5)(q12q33)[8]/47-50,sl,t,+r[8]                                                                                        | 1                             | 1                               | 0                             | 0                    | 3.0  | 1                                  | 57                                            | 0                                   | 57                                          | 0                                | 0                            |
| 571656 | M      | 71                 | 4            | RAEB   | 46,del(20)(q11.2q13.3)[12]/46,XY[8]                                                                                                                                                                      | 0                             | 0                               | 0                             | 0                    | 0.5  | 1                                  | 303                                           | 1                                   | 231                                         | 0                                | 1                            |
| 574490 | M      | 57                 | 1            | RA     | 46,XY[20]                                                                                                                                                                                                | 1                             | 0                               | 0                             | 0                    | 0.0  | 1                                  | 874                                           |                                     |                                             |                                  |                              |

|        |   |    |    |        |                                                                                                                                                                                                                                                                                                   |  |  |  |   |   |     |     |      |      |      |      |      |
|--------|---|----|----|--------|---------------------------------------------------------------------------------------------------------------------------------------------------------------------------------------------------------------------------------------------------------------------------------------------------|--|--|--|---|---|-----|-----|------|------|------|------|------|
| 643607 | F | 79 | 3  | RA     | 46_XX[20]                                                                                                                                                                                                                                                                                         |  |  |  |   |   | 0.0 | 1   | 897  | 0    | 14   | 0    | 0    |
| 657314 | F | 28 | 4  | RAEB   | 45_XX-7[5]                                                                                                                                                                                                                                                                                        |  |  |  | 1 | 0 | 1.5 | 0   | 1704 | 0    | 1681 | 0    | 0    |
| 667720 | F | 66 | 10 | RAEB   | 46_XX[20]                                                                                                                                                                                                                                                                                         |  |  |  | 0 | 0 | 1.0 | 1   | 724  | 1    | 644  | 0    | 0    |
| 672525 | F | 73 | 5  | RAEB   | 46_XX[20]                                                                                                                                                                                                                                                                                         |  |  |  | 0 | 0 | 0   | 1   | 2395 | 0    | 2247 | 0    | 0    |
| 684211 | F | 62 | 1  | RAR    | 46_XX.del(5)(q13q33).del(20)(q11.2)[cp5]                                                                                                                                                                                                                                                          |  |  |  | 1 | 1 | 0   | 0   | 0.5  | 1    | 325  | 1    | 231  |
| 690100 | M | 66 | 15 | RAEB   | 43-45.XY.del(5)(q22q35).der(16)(16.17)(q22;q21).-17.add(17)(p11.2).-18.dic(18:21)(p11.1;q22).der(22)(1:22)(p13;p11.2).+0-2mar[cp19]47.XY.+12[1]                                                                                                                                                   |  |  |  | 1 | 0 | 0   | 0   | 3.0  | 1    | 331  | 1    | 324  |
| 693881 | F | 78 | 11 | RAEB   | 44_XX-3.del(5)(q13q33).-7.add(9)(q22).add(13)(p11.2).-18.add(18)(p11.2).-20.+2mar[18]46_XX[2]                                                                                                                                                                                                     |  |  |  | 1 | 1 | 1   | 0   | 3.0  | 1    | 383  | 0    | 369  |
| 696026 | M | 48 | 0  | RA     | 47_XY.+8[2]47.idem.add(3)(q21)[6]47.add(3)(q21).del(12)(p11.2p13)[12]                                                                                                                                                                                                                             |  |  |  | 0 | 0 | 0   | 1   | 1.5  | 0    | 4566 | 0    | 4498 |
| 697296 | M | 71 | 3  | RA     | 46_XY[20]                                                                                                                                                                                                                                                                                         |  |  |  | 0 | 0 | 0   | 0   | 0.5  | 1    | 1385 | 0    | 87   |
| 698840 | F | 77 | 13 | RAEB   | 46_XX.del(5)(q13q23)[1]42-47.si.dic(15:20)(p11.2;q13.3).add(22)(p11.1)[cp3]44-47.si.dic(3)(3;15)(p11.2;q11.1).der(14;22)(q10;q10).+0-5mar[cp6]82-87.si2.-3.del(4)(q727)x2.-7.add(12)(p11.2)x2.der(15:21)(q10;q10).der(15;22)(q10;q10).-17.-17.+19.-21.add(21)(p11.2).-22.-22.+0-5mar[cp9]46_XX[1] |  |  |  | 0 | 0 | 1   | 0   | 3.0  | 1    | 253  | 0    | 7    |
| 703653 | F | 20 | 0  | RA     | 46_XY[20]                                                                                                                                                                                                                                                                                         |  |  |  | 0 | 0 | 0   | 0   | 0.5  | 0    | 2257 | 0    | 2092 |
| 705782 | M | 34 | 5  | RAEB   | 46_XX.[1;3;5](q21;q31)[13]46.idem.2add(12)(q24.3)[5]46_XY.2add(12)(q24.3)[2]                                                                                                                                                                                                                      |  |  |  | 0 | 0 | 0   | 0   | 2.0  | 0    | 1711 | 0    | 1703 |
| 717045 | F | 48 | 2  | RA     | 46_XX.del(5)(q13q33)[20]                                                                                                                                                                                                                                                                          |  |  |  | 1 | 0 | 0   | 0   | 0.5  | 1    | 393  | 0    | 393  |
| 732776 | F | 47 | 8  | RAEB   | 46_XX[20]                                                                                                                                                                                                                                                                                         |  |  |  | 0 | 0 | 0   | 0   | 1.0  | 0    | 2255 | 0    | 11   |
| 736895 | M | 54 | 2  | RA     | 43-49.XY.-4.-5.-7.add(12)(p11.2).-20.-21.+1-6mar[cp7]                                                                                                                                                                                                                                             |  |  |  | 1 | 1 | 1   | 0   | 1.5  | 1    | 38   | 0    | 26   |
| 747967 | M | 41 | 2  | RA     | 46_XY.+1.der(1:15)(q10;q10)[8]46_XY.+1.der(1:7)(q10;p10)[4]46_XY[8]                                                                                                                                                                                                                               |  |  |  | 0 | 0 | 0   | 0   | 1.0  | 0    | 1940 | 0    | 1899 |
| 753222 | M | 79 | 0  | RA     | 60-61.XXY.add(3)(p21).del(5)(q13q33).add(6)(q25).-7.-8.-9.add(14)(p11.2).-16.-17.+19.add(19)(q13.4)x2.-22[cp2]46_XY[68]                                                                                                                                                                           |  |  |  | 1 | 0 | 1   | 0   | 1.5  | 1    | 123  | 0    | 123  |
| 783437 | M | 63 | 8  | RAEB   | 46_XY[20]                                                                                                                                                                                                                                                                                         |  |  |  | 0 | 0 | 0   | 0   | 1.0  | 1    | 1095 | 1    | 594  |
| 785104 | F | 44 | 2  | RA     | 46_XX[20]                                                                                                                                                                                                                                                                                         |  |  |  | 0 | 0 | 0   | 0   | 0.0  | 0    | 1317 | 0    | 1172 |
| 791334 | F | 66 | 3  | RA     | 46_XX[20]                                                                                                                                                                                                                                                                                         |  |  |  | 0 | 0 | 0   | 0   | 0.5  | 1    | 923  | 0    | 923  |
| 804059 | M | 69 | 9  | RAEB   | 47_XY.+8[20]                                                                                                                                                                                                                                                                                      |  |  |  | 0 | 0 | 0   | 1   | 2.5  | 1    | 878  | 1    | 267  |
| 809605 | M | 75 | 14 | RAEB   | 46_XY[12]                                                                                                                                                                                                                                                                                         |  |  |  | 0 | 0 | 0   | 0   | 2.0  | 0    | 849  | 0    | 849  |
| 817019 | F | 65 | 3  | RA     | 46_XX.idel(20)(q11.2)[9]46_XX[11]                                                                                                                                                                                                                                                                 |  |  |  | 0 | 1 | 0   | 0   | 0.0  | 0    | 1172 | 0    | 861  |
| 827584 | M | 62 | 8  | RAEB   | 47_XY.+8[15]46_XY[5]                                                                                                                                                                                                                                                                              |  |  |  | 0 | 0 | 1   | 1.0 | 0    | 1710 | 0    | 1703 |      |
| 843623 | M | 60 | 6  | RAEB   | 46_XY.del(20)(q11.2q13.3)[2]46_XY[18]                                                                                                                                                                                                                                                             |  |  |  | 0 | 1 | 0   | 1.0 | 1    | 139  | 1    | 71   |      |
| 845446 | M | 73 | 13 | RAEB   | 47_XY.+8.del(12)(p11.2p13)[18]47.idem.del(3)(q21)[2]                                                                                                                                                                                                                                              |  |  |  | 0 | 0 | 0   | 1   | 3.0  | 1    | 251  | 0    | 251  |
| 846155 | M | 64 | 0  | RA     | 46_XY[20]                                                                                                                                                                                                                                                                                         |  |  |  | 0 | 0 | 0   | 0   | 0.5  | 0    | 1023 | 0    | 1026 |
| 854400 | M | 63 | 0  | RA     | 46_XY.yqh+20]                                                                                                                                                                                                                                                                                     |  |  |  | 0 | 0 | 0   | 0   | 0.0  | 1    | 945  | 0    | 923  |
| 855934 | M | 62 | 26 | RAEB-T | 46_XY[20]                                                                                                                                                                                                                                                                                         |  |  |  | 0 | 0 | 0   | 0   | 2.5  | 0    | 453  | 0    | 453  |
| 857645 | M | 60 | ND | RA     | 46_XY[20]                                                                                                                                                                                                                                                                                         |  |  |  | 0 | 0 | 0   | 0   | UK   | 1    | 860  | 1    | 821  |
| 859640 | F | 64 | 3  | RA     | 46_XX[20]                                                                                                                                                                                                                                                                                         |  |  |  | 0 | 0 | 0   | 0   | 1.5  | 1    | 609  | 1    | 252  |
| 861691 | M | 62 | 13 | RAEB   | 45_XY-7[15]46_XY[5]                                                                                                                                                                                                                                                                               |  |  |  | 0 | 0 | 1   | 0   | 3.0  | 0    | 3144 | 0    | 118  |
| 875301 | F | 62 | 14 | RAEB   | 46_XX[20]                                                                                                                                                                                                                                                                                         |  |  |  | 0 | 0 | 0   | 0   | 1.5  | 1    | 463  | 1    | 81   |
| 879047 | F | 74 | 17 | RAEB   | 46_XX.del(11)(q21q24)[13]46_XX[7]                                                                                                                                                                                                                                                                 |  |  |  | 0 | 0 | 0   | 0   | 2.5  | 1    | 980  | 0    | 980  |
| 882525 | M | 57 | 7  | RAEB   | 41-49.XY.+X.XX.del(5)(q22q35).del(7)(q22).+8.-12.add(12)(p12).-13.-18.+1-4mar[cp20]                                                                                                                                                                                                               |  |  |  | 1 | 0 | 1   | 1   | 2.0  | 1    | 148  | 1    | 88   |
| 889352 | M | 72 | 14 | RAEB   | 39-44.XY.del(4)(q31)[14].der(5)(5:?)q21.?)[17].del(6)(q21)[19].-7[19].add(12)(p13)[18].-18[18]cp19]                                                                                                                                                                                               |  |  |  | 0 | 0 | 1   | 0   | 3.0  | 1    | 42   | 0    | 42   |
| 911999 | M | 36 | 4  | RA     | 46_XY[20]                                                                                                                                                                                                                                                                                         |  |  |  | 0 | 0 | 0   | 0   | 0.0  | 0    | 3250 | 0    | 3232 |
| 912290 | M | 59 | 1  | RA     | 46_XY[20]                                                                                                                                                                                                                                                                                         |  |  |  | 0 | 0 | 0   | 0   | 0.5  | 1    | 696  | 0    | 696  |
| 917011 | M | 79 | 0  | RA     | 46_XY.del(20)(q11.2)[12]46_XY[8]                                                                                                                                                                                                                                                                  |  |  |  | 0 | 1 | 0   | 0   | 0.5  | 1    | 809  | 0    | 769  |
| 936943 | M | 43 | ND | RAEB   | failed.                                                                                                                                                                                                                                                                                           |  |  |  | 0 | 0 | 0   | 0   | UK   | 1    | 1300 | 0    | 1289 |
| 937954 | M | 51 | 12 | RAEB   | 47_XY.+8[1]47.idem.del(16)(q12.1)[13]48.idem.+Y.del(16)(q11.1)[5]46_XY[1]                                                                                                                                                                                                                         |  |  |  | 0 | 0 | 0   | 1   | 2.5  | 1    | 729  | 0    | 131  |
| 943264 | M | 65 | 11 | RAEB   | 46_XY[20]                                                                                                                                                                                                                                                                                         |  |  |  | 0 | 0 | 0   | 0   | 1.5  | 0    | 891  | 0    | 848  |
| 944541 | M | 54 | 20 | RAEB   | 45_XY-7[19]46_XY[1]                                                                                                                                                                                                                                                                               |  |  |  | 0 | 0 | 1   | 0   | 3.0  | 1    | 1630 | 0    | 1630 |
| 947519 | M | 59 | 7  | RAEB   | 46_XY.1-5dms[10]46_XY[12]                                                                                                                                                                                                                                                                         |  |  |  | 0 | 0 | 0   | 0   | 1.5  | 1    | 734  | 1    | 699  |
| 949197 | F | 60 | 2  | RA     | failed                                                                                                                                                                                                                                                                                            |  |  |  | 0 | 0 | 0   | 0   | UK   | 1    | 108  | 0    | 89   |
| 958595 | F | 82 | 4  | RA     | 46_XX.del(11)(q23)[20]                                                                                                                                                                                                                                                                            |  |  |  | 0 | 0 | 0   | 0   | 1.0  | 1    | 975  | 0    | 975  |
| 973424 | M | 56 | 3  | RA     | 46_XY[20]                                                                                                                                                                                                                                                                                         |  |  |  | 0 | 0 | 0   | 0   | 0.0  | 0    | 1228 | 0    | 1027 |
| 975079 | M | 62 | 0  | RA     | 46_XY[20]                                                                                                                                                                                                                                                                                         |  |  |  | 0 | 0 | 0   | 0   | 0.0  | 1    | 1563 | 0    | 1563 |
| 983677 | F | 60 | 8  | RAEB   | 46_XX.del(5)(q21q35)[4]69_XX.+X.+1.+1.+2.+del(5)(q21q35).+5.+6.+8.+9.+9.+10.+11.+11.+13.+13.+14.+14.+16.+16.+19.+19.+20.+21.-22.+mar1.+mar2]7]46_XX[9]                                                                                                                                            |  |  |  | 1 | 0 | 0   | 1   | 2.0  | 1    | 85   | 1    | 44   |
| 987089 | F | 64 | 3  | RAEB   | 56-58.XX.+X.+del(3)(p12).del(5)(q13q33).+6.+8.+der(8)add(8q22).+10.+11.+13.+14.-17.+19.+21.+mar[cp20]                                                                                                                                                                                             |  |  |  | 1 | 0 | 0   | 1   | 2.0  | 1    | 762  | 1    | 678  |
| 988428 | M | 70 | 2  | RAR    | 47_XY-9.+2mar[1]46_XY[19]                                                                                                                                                                                                                                                                         |  |  |  | 0 | 0 | 0   | 0   | 0.5  | 1    | 1975 | 0    | 1891 |
| 989739 | M | 71 | 18 | RAEB   | 46_XY.del(7)(q21)[11]47_XY.+8[5]46_XY[4]                                                                                                                                                                                                                                                          |  |  |  | 0 | 0 | 1   | 1   | 3.0  | 1    | 468  | 1    | 125  |
| 994096 | M | 72 | 3  | RA     | 46_XY.del(5)(q14q34).+8.del(11)(q21q23)[19]46.idem.del(17)(q24)[1]                                                                                                                                                                                                                                |  |  |  | 1 | 0 | 0   | 1   | 1.0  | 1    | 1307 | 0    | 1178 |
| 999103 | F | 66 | 6  | RAEB   | 46_XX.del(5)(q15q13)[20]                                                                                                                                                                                                                                                                          |  |  |  | 1 | 0 | 0   | 0   | 1.0  | 1    | 4813 | 0    | 2839 |
| 01-13  | F | 41 | 12 | RAEB   | 46_XX.inv(3)(q21q26)[13]46.idem.t(14:17)(q13;p13)[1]                                                                                                                                                                                                                                              |  |  |  | 0 | 0 | 0   | 0   | 2.0  | 1    | 1649 | 1    | 1301 |
| 02-21  | M | 57 | 3  | RA     | 46_XY.t(3:12)(q27;p13)[20]                                                                                                                                                                                                                                                                        |  |  |  | 0 | 0 | 0   | 0   | 1.0  | 1    | 709  | 0    | 709  |
| 02-28  | M | 60 | 1  | RA     | 46_XY.t(5:15)(p10;q10)[2]46_XY[18]                                                                                                                                                                                                                                                                |  |  |  | 0 | 0 | 0   | 0   | 1.0  | 1    | 76   | 0    | 76   |
| 02-30  | M | 72 | 2  | RA     | 46-48.XY.add(5)(q11.2).-7oradd(7)(q11.2).add(8)(p22).del(13)(q21).add(16)(q722).del(22)(q12).+1-3mar[cp19]46_XY[1]                                                                                                                                                                                |  |  |  | 0 | 0 | 1   | 0   | 1.5  | 1    | 239  | 1    | 205  |
| 02-75  | F | 46 | 10 | RAEB   | 46_XX[20]                                                                                                                                                                                                                                                                                         |  |  |  | 0 | 0 | 0   | 0   | 0.5  | 0    | 3247 | 0    | 3014 |
| 02-77  | M | 67 | 28 | RAEB-T | 46_XY[20]                                                                                                                                                                                                                                                                                         |  |  |  | 0 | 0 | 0   | 0   | 2.0  | 1    | 1863 | 1    | 1662 |
| 02-86  | M | 53 | 21 | RAEB-T | 92-<4n>-XXYY.del(4)(q33)x2.del(5)(q13).add(11)(q23)x2[cp8]46_XY[12]                                                                                                                                                                                                                               |  |  |  | 1 | 0 | 0   | 0   | 3.0  | 1    | 308  | 1    | 133  |
| 02-99  | M | 66 | 16 | RAEB   | 46_XY.del(2)(q33).del(5)(q15q33).-7.+del(11)(q273)[cp6]                                                                                                                                                                                                                                           |  |  |  | 1 | 0 | 1   | 0   | 3.0  | 1    | 945  | 0    | 933  |

| Supplementary Table 8. Primers used for U2AF1 sequencing.               |            |       |            |           |                                            |                                               |                                                                    |
|-------------------------------------------------------------------------|------------|-------|------------|-----------|--------------------------------------------|-----------------------------------------------|--------------------------------------------------------------------|
| Ensembl TranscriptID                                                    | Chromosome | Exon# | Exon Start | Exon Stop | Primer 1 Sequence*                         | Primer 2 Sequence                             | Ensembl ExonIDs                                                    |
| <b>gDNA primers: targets U2AF1 hotspot only</b>                         |            |       |            |           |                                            |                                               |                                                                    |
| ENST00000398137                                                         | 21         | 2     | 43397494   | 43397581  | tgtaactcAAACAAACCTGGTAAACGTCG              | acatgatgcaAATTTGATAGTGTATGTCATGCTGCTG         | ENSE00001531800                                                    |
| ENST00000398137                                                         | 21         | 2     | 43397494   | 43397581  | acgactacagAAACAAACCTGGTAAACGTCG            | tgctgatgcAATTTGATAGTGTATGTCATGCTGCTG          | ENSE00001531800                                                    |
| ENST00000398137                                                         | 21         | 2     | 43397494   | 43397581  | cgtgactagAAACAAACCTGGTAAACGTCG             | gcatctgacAATTTGATAGTGTATGTCATGCTGCTG          | ENSE00001531800                                                    |
| ENST00000398137                                                         | 21         | 2     | 43397494   | 43397581  | taagatgatAAACAAACCTGGTAAACGTCG             | atgtcctacAATTTGATAGTGTATGTCATGCTGCTG          | ENSE00001531800                                                    |
| ENST00000398137                                                         | 21         | 2     | 43397494   | 43397581  | tactctgtgAAACAAACCTGGTAAACGTCG             | atgagagcacAATTTGATAGTGTATGTCATGCTGCTG         | ENSE00001531800                                                    |
| ENST00000398137                                                         | 21         | 2     | 43397494   | 43397581  | tagagagagAAACAAACCTGGTAAACGTCG             | atctctgtcAATTTGATAGTGTATGTCATGCTGCTG          | ENSE00001531800                                                    |
| ENST00000398137                                                         | 21         | 2     | 43397494   | 43397581  | tgctgctcgAAACAAACCTGGTAAACGTCG             | agcagcagcAATTTGATAGTGTATGTCATGCTGCTG          | ENSE00001531800                                                    |
| ENST00000398137                                                         | 21         | 2     | 43397494   | 43397581  | acatcagcgtAAACAAACCTGGTAAACGTCG            | tgtagcgcaAATTTGATAGTGTATGTCATGCTGCTG          | ENSE00001531800                                                    |
| ENST00000398137                                                         | 21         | 2     | 43397494   | 43397581  | acgcgactatAAACAAACCTGGTAAACGTCG            | tgctcgataAATTTGATAGTGTATGTCATGCTGCTG          | ENSE00001531800                                                    |
| ENST00000398137                                                         | 21         | 2     | 43397494   | 43397581  | actactatgAAACAAACCTGGTAAACGTCG             | tgtagatacAATTTGATAGTGTATGTCATGCTGCTG          | ENSE00001531800                                                    |
| ENST00000398137                                                         | 21         | 2     | 43397494   | 43397581  | actgacagtAAACAAACCTGGTAAACGTCG             | tgcatgtcaAATTTGATAGTGTATGTCATGCTGCTG          | ENSE00001531800                                                    |
| ENST00000398137                                                         | 21         | 2     | 43397494   | 43397581  | agcactataAAACAAACCTGGTAAACGTCG             | tcgatatgaAATTTGATAGTGTATGTCATGCTGCTG          | ENSE00001531800                                                    |
| ENST00000398137                                                         | 21         | 2     | 43397494   | 43397581  | agrcctgctAAACAAACCTGGTAAACGTCG             | tgccagcagaAATTTGATAGTGTATGTCATGCTGCTG         | ENSE00001531800                                                    |
| ENST00000398137                                                         | 21         | 2     | 43397494   | 43397581  | agtagcgtAAACAAACCTGGTAAACGTCG              | tcactgataAATTTGATAGTGTATGTCATGCTGCTG          | ENSE00001531800                                                    |
| ENST00000398137                                                         | 21         | 2     | 43397494   | 43397581  | caagctagAAACAAACCTGGTAAACGTCG              | ggtgagtgaAATTTGATAGTGTATGTCATGCTGCTG          | ENSE00001531800                                                    |
| ENST00000398137                                                         | 21         | 2     | 43397494   | 43397581  | tgtagagcgtAAACAAACCTGGTAAACGTCG            | gtcatctgcaAATTTGATAGTGTATGTCATGCTGCTG         | ENSE00001531800                                                    |
| ENST00000398137                                                         | 21         | 2     | 43397494   | 43397581  | cgacgtgacAAACAAACCTGGTAAACGTCG             | gctgcaactgaAATTTGATAGTGTATGTCATGCTGCTG        | ENSE00001531800                                                    |
| ENST00000398137                                                         | 21         | 2     | 43397494   | 43397581  | taacacactAAACAAACCTGGTAAACGTCG             | atgtgtggaAATTTGATAGTGTATGTCATGCTGCTG          | ENSE00001531800                                                    |
| ENST00000398137                                                         | 21         | 2     | 43397494   | 43397581  | taacagtgatAAACAAACCTGGTAAACGTCG            | atgtgcaactAATTTGATAGTGTATGTCATGCTGCTG         | ENSE00001531800                                                    |
| ENST00000398137                                                         | 21         | 2     | 43397494   | 43397581  | taacagatgAAACAAACCTGGTAAACGTCG             | atgtctagcaAATTTGATAGTGTATGTCATGCTGCTG         | ENSE00001531800                                                    |
| ENST00000398137                                                         | 21         | 2     | 43397494   | 43397581  | taacgtgtcAAACAAACCTGGTAAACGTCG             | atgcagcagaAATTTGATAGTGTATGTCATGCTGCTG         | ENSE00001531800                                                    |
| ENST00000398137                                                         | 21         | 2     | 43397494   | 43397581  | taagttagaAAACAAACCTGGTAAACGTCG             | atcacatcaAATTTGATAGTGTATGTCATGCTGCTG          | ENSE00001531800                                                    |
| ENST00000398137                                                         | 21         | 2     | 43397494   | 43397581  | tgatcacgtAAACAAACCTGGTAAACGTCG             | agctagtgaAATTTGATAGTGTATGTCATGCTGCTG          | ENSE00001531800                                                    |
| ENST00000398137                                                         | 21         | 2     | 43397494   | 43397581  | tgccactagAAACAAACCTGGTAAACGTCG             | agcctgacAATTTGATAGTGTATGTCATGCTGCTG           | ENSE00001531800                                                    |
| <b>cDNA primers: targets U2AF1 hotspot only</b>                         |            |       |            |           |                                            |                                               |                                                                    |
| ENST00000398137                                                         | 21         | 1-4   | 43393632   | 43400757  | acagtgctgGGAGTATCTGGCCTCCATCTTC            | tgctcacgcaGTCAGCAGACTGGGAAGAGTTT              | ENSE00001582950, ENSE00001531800, ENSE00001531797, ENSE00001531794 |
| ENST00000398137                                                         | 21         | 1-4   | 43393632   | 43400757  | acgtctgacaGGAGTATCTGGCCTCCATCTTC           | tgccagctgtGTCAGCAGACTGGGAAGAGTTT              | ENSE00001582950, ENSE00001531800, ENSE00001531797, ENSE00001531794 |
| ENST00000398137                                                         | 21         | 1-4   | 43393632   | 43400757  | agaccctacGGAGTATCTGGCCTCCATCTTC            | tcctgctgtagGTCAGCAGACTGGGAAGAGTTT             | ENSE00001582950, ENSE00001531800, ENSE00001531797, ENSE00001531794 |
| ENST00000398137                                                         | 21         | 1-4   | 43393632   | 43400757  | agactgttagGGAGTATCTGGCCTCCATCTTC           | tcgtgacacGTCAGCAGACTGGGAAGAGTTT               | ENSE00001582950, ENSE00001531800, ENSE00001531797, ENSE00001531794 |
| ENST00000398137                                                         | 21         | 1-4   | 43393632   | 43400757  | atcacagcagGGAGTATCTGGCCTCCATCTTC           | tagctgtgtcGTCAGCAGACTGGGAAGAGTTT              | ENSE00001582950, ENSE00001531800, ENSE00001531797, ENSE00001531794 |
| ENST00000398137                                                         | 21         | 1-4   | 43393632   | 43400757  | atatcgcagGGAGTATCTGGCCTCCATCTTC            | tatagcctcGTCAGCAGACTGGGAAGAGTTT               | ENSE00001582950, ENSE00001531800, ENSE00001531797, ENSE00001531794 |
| ENST00000398137                                                         | 21         | 1-4   | 43393632   | 43400757  | cgltgctcaGGAGTATCTGGCCTCCATCTTC            | gcacagagatGTCAGCAGACTGGGAAGAGTTT              | ENSE00001582950, ENSE00001531800, ENSE00001531797, ENSE00001531794 |
| ENST00000398137                                                         | 21         | 1-4   | 43393632   | 43400757  | ctcgcgtgtGGAGTATCTGGCCTCCATCTTC            | gagcgcacagGTCAGCAGACTGGGAAGAGTTT              | ENSE00001582950, ENSE00001531800, ENSE00001531797, ENSE00001531794 |
| ENST00000398137                                                         | 21         | 1-4   | 43393632   | 43400757  | taqtatcagGGAGTATCTGGCCTCCATCTTC            | atcatatcgGTCAGCAGACTGGGAAGAGTTT               | ENSE00001582950, ENSE00001531800, ENSE00001531797, ENSE00001531794 |
| <b>3730 recurrent screening primers: targets all U2AF1 coding exons</b> |            |       |            |           |                                            |                                               |                                                                    |
| ENST00000398137                                                         | 21         | 9     | 43386136   | 43386428  | tgtaaaacgcgcagcITGAGAGAGTGGGTGGTTCTG       | caggaaacagctatgaccCCCTTATGAACTGGTTGGTCAAT     | ENSE00001138177                                                    |
| ENST00000398137                                                         | 21         | 9     | 43386136   | 43386428  | tgtaaaacgcgcagcGAGAGTGGGTGGTTCGTGC         | caggaaacagctatgaccTCTTACGATCTCTGACCCG         | ENSE00001138177                                                    |
| ENST00000398137                                                         | 21         | 8     | 43387650   | 43387742  | tgtaaaacgcgcagcITAACCGTGGTTAATGGACGCC      | caggaaacagctatgaccGAGGGTGGTAGGGGAGAAAGAA      | ENSE00001268168                                                    |
| ENST00000398137                                                         | 21         | 7     | 43387834   | 43387967  | tgtaaaacgcgcagcITAAACCGTGGTTAATGGACGCC     | caggaaacagctatgaccGAGGGTGGTAGGGGAGAAAGAA      | ENSE00001050518                                                    |
| ENST00000398137                                                         | 21         | 7     | 43387834   | 43387967  | tgtaaaacgcgcagcITAAAGTCTTATAAAGCGTGGATGGC  | caggaaacagctatgaccCACTACTGACGGCAGCAGCG        | ENSE00001050518                                                    |
| ENST00000398137                                                         | 21         | 6     | 43388617   | 43388715  | tgtaaaacgcgcagcITGATCTTCTGTACTGTTGGAAAG    | caggaaacagctatgaccCACTGTCTGCTTTGCGCTG         | ENSE00001050529                                                    |
| ENST00000398137                                                         | 21         | 5     | 43388873   | 43388922  | tgtaaaacgcgcagcITGTTGTGTACTGTAGCAGTTGTAG   | caggaaacagctatgaccACTCTGAAGGGAGACCACAG        | ENSE00001531791                                                    |
| ENST00000398137                                                         | 21         | 4     | 43393632   | 43393698  | tgtaaaacgcgcagcITCAACTCACTGAAAGCCTTGCC     | caggaaacagctatgaccCCTTGCCACTCTAGTGAAACG       | ENSE00001531794                                                    |
| ENST00000398137                                                         | 21         | 3     | 43394545   | 43394611  | tgtaaaacgcgcagcITGCCATTTGCAACAATAATGTCTCT  | caggaaacagctatgaccCAGCAGCTCAGAACGCCAACAT      | ENSE00001531797                                                    |
| ENST00000398137                                                         | 21         | 2     | 43397494   | 43397581  | tgtaaaacgcgcagcITGAACCAAAATGGAAAATCAACTACG | caggaaacagctatgaccTTCAAATTTGAGCATGTCTGCT      | ENSE00001531800                                                    |
| ENST00000398137                                                         | 21         | 2     | 43397494   | 43397581  | tgtaaaacgcgcagcITAAACAAACCTGGTAAACGTCG     | caggaaacagctatgaccAATTTGATAGTGTATGTCATGCTGCTG | ENSE00001531800                                                    |
| ENST00000398137                                                         | 21         | 1     | 43400630   | 43400757  | tgtaaaacgcgcagcITAGAGCGTCTGCCTGCTCCG       | caggaaacagctatgaccCCACCCTCAACCACCC            | ENSE00001582950                                                    |

\*lower case, bar code; upper case,U2AF1 sequence

Supplementary Table 9. Expression of Tier 1 mutated genes in sAML sample.

| Chromosome | Position* | Gene name       | Transcript ID   | Exons | Mutant Exon | Total Probes | Present Probes |                 |             |                 | Probes in Mutant Exon | Present Probes in Mutant Exon |                 |                 |                 |
|------------|-----------|-----------------|-----------------|-------|-------------|--------------|----------------|-----------------|-------------|-----------------|-----------------------|-------------------------------|-----------------|-----------------|-----------------|
|            |           |                 |                 |       |             |              | in UPN         | in > 50% of AML | in > 75% of | in > 90% of AML |                       | in UPN                        | in > 50% of AML | in > 75% of AML | in > 90% of AML |
|            |           |                 |                 |       |             |              | 266395         | samples         | AML samples | samples         |                       | 266395                        | samples         | samples         | samples         |
| 1          | 112325945 | KCND3           | NM_004980       | 8     | 2           | 20           | 3              | 2               | 2           | 1               | 3                     | 0                             | 0               | 0               | 0               |
| 1          | 205309412 | PKFEB2          | NM_006212       | 15    | 11          | 29           | 2              | 15              | 9           | 4               | 1                     | 0                             | 1               | 0               | 0               |
| 1          | 229096537 | ENSG00000222671 | ENST00000410739 | NA    | NA          | NA           | NA             | NA              | NA          | NA              | NA                    | NA                            | NA              | NA              | NA              |
| 2          | 20289990  | LOC100131373    | XM_001720891    | 1     | 1           | 3            | 1              | 3               | 1           | 1               | 1                     | 1                             | 0               | 0               | 0               |
| 2          | 61569230  | XPO1            | NM_003400       | 25    | 18          | 38           | 31             | 33              | 33          | 33              | 1                     | 1                             | 1               | 1               | 1               |
| 3          | 173529456 | FNDC3B          | NM_022763       | 25    | 11          | 43           | 41             | 43              | 43          | 42              | 2                     | 2                             | 2               | 2               | 2               |
| 5          | 50152869  | PARP8           | NM_024615       | 26    | 16          | 31           | 28             | 30              | 29          | 27              | 1                     | 1                             | 1               | 1               | 1               |
| 5          | 148880083 | CSNK1A1         | NM_001025105    | 11    | 4           | 26           | 24             | 25              | 24          | 24              | 1                     | 1                             | 1               | 1               | 1               |
| 6          | 105713110 | POPDC3          | NM_022361       | 4     | 4           | 13           | 0              | 1               | 0           | 0               | 3                     | 0                             | 0               | 0               | 0               |
| 9          | 89535224  | CTSL1           | NM_001912       | 8     | 7           | 20           | 9              | 11              | 5           | 5               | 1                     | 1                             | 1               | 1               | 1               |
| 9          | 138867831 | MAMDC4          | NM_206920       | 27    | 4           | 49           | 12             | 13              | 11          | 9               | 1                     | 0                             | 0               | 0               | 0               |
| 9          | 139117274 | MAN1B1          | ENST00000371587 | 9     | 9           | 45           | 17             | 21              | 17          | 15              | 8                     | 5                             | 6               | 5               | 5               |
| 10         | 82288101  | SH2D4B          | NM_207372       | 7     | 1           | 17           | 4              | 6               | 4           | 1               | 1                     | 0                             | 0               | 0               | 0               |
| 11         | 22340860  | SLC17A6         | NM_020346       | 12    | splice_site | 15           | 2              | 2               | 0           | 0               | NA                    | NA                            | NA              | NA              | NA              |
| 11         | 30881639  | DCDC5           | ENST00000406071 | 15    | 12          | 54           | 3              | 3               | 3           | 2               | 2                     | 0                             | 0               | 0               | 0               |
| 14         | 75418958  | TTLL5           | NM_015072       | 32    | 30          | 50           | 41             | 45              | 44          | 40              | 2                     | 2                             | 2               | 2               | 2               |
| 16         | 7716860   | ENSG00000209555 | ENST00000386820 | NA    | NA          | NA           | NA             | NA              | NA          | NA              | NA                    | NA                            | NA              | NA              | NA              |
| 16         | 63589987  | CDH11           | NM_001797       | 13    | 4           | 28           | 5              | 8               | 4           | 4               | 2                     | 0                             | 0               | 0               | 0               |
| 17         | 5288451   | DHX33           | NM_020162       | 12    | 12          | 17           | 6              | 13              | 11          | 7               | 1                     | 0                             | 0               | 0               | 0               |
| 17         | 7696343   | JMJD3           | NM_001080424    | 22    | 19          | 44           | 19             | 27              | 22          | 21              | 1                     | 0                             | 0               | 0               | 0               |
| 17         | 29981226  | TMEM132E        | NM_207313       | 10    | 6           | 13           | 4              | 3               | 2           | 2               | 1                     | 0                             | 0               | 0               | 0               |
| 17         | 75696250  | GAA             | NM_000152       | 20    | 5           | 27           | 5              | 6               | 4           | 2               | 1                     | 0                             | 0               | 0               | 0               |
| 18         | 46165704  | C18orf24        | NM_001039535    | 7     | 5           | 14           | 3              | 6               | 2           | 2               | 1                     | 0                             | 1               | 0               | 0               |
| 19         | 53579461  | KDELR1          | NM_006801       | 5     | 4           | 12           | 7              | 8               | 8           | 6               | 2                     | 1                             | 2               | 2               | 1               |
| 19         | 54349852  | HRC             | NM_002152       | 6     | 1           | 16           | 1              | 3               | 3           | 2               | 9                     | 1                             | 2               | 2               | 2               |
| 20         | 32728482  | PIGU            | NM_080476       | 12    | 1           | 18           | 16             | 16              | 15          | 12              | 1                     | 1                             | 1               | 1               | 0               |
| 20         | 32965857  | ACSS2           | NM_018677       | 18    | 7           | 28           | 18             | 16              | 11          | 7               | 2                     | 1                             | 1               | 1               | 0               |
| 20         | 51626823  | ZNF217          | NM_006526       | 5     | 3           | 15           | 15             | 15              | 15          | 12              | 5                     | 5                             | 5               | 5               | 5               |
| 21         | 42402818  | UMODL1          | NM_173568       | 22    | 10          | 28           | 4              | 5               | 4           | 4               | 1                     | 0                             | 0               | 0               | 0               |
| 21         | 43397525  | U2AF1           | NM_001025203    | 8     | 2           | 22           | 18             | 22              | 22          | 20              | 1                     | 1                             | 1               | 1               | 1               |

\*using NCBI Build 36. NA, not available.

## Supplementary References

1. Mardis, E.R. et al. Recurring mutations found by sequencing an acute myeloid leukemia genome. *N Engl J Med* **361**, 1058-66 (2009).
2. Kralovicova, J. & Vorechovsky, I. Allele-specific recognition of the 3' splice site of INS intron 1. *Hum Genet* **128**, 383-400 (2010).
3. Graubert, T.A. et al. Integrated genomic analysis implicates haploinsufficiency of multiple chromosome 5q31.2 genes in de novo myelodysplastic syndromes pathogenesis. *PLoS ONE* **4**, e4583 (2009).
4. Tusher, V.G., Tibshirani, R. & Chu, G. Significance analysis of microarrays applied to the ionizing radiation response. *Proc Natl Acad Sci U S A* **98**, 5116-21 (2001).
5. Subramanian, A. et al. Gene set enrichment analysis: a knowledge-based approach for interpreting genome-wide expression profiles. *Proc Natl Acad Sci U S A* **102**, 15545-50 (2005).
6. Dennis, G., Jr. et al. DAVID: Database for Annotation, Visualization, and Integrated Discovery. *Genome Biol* **4**, P3 (2003).
